# Supplementary material
Source: PubMed Central journal article supplement (PMC10231578)
Supplement: ebmental-2021-300334supp001.pdf [file ebmental-2021-300334supp001.pdf]

## Appendix

**Table 1.** Search strategy in Medline, February 4, 2020

|     |                                                                                                                                                                                                                                                                                                                                                                                                                                                                                                                    |         |
|-----|--------------------------------------------------------------------------------------------------------------------------------------------------------------------------------------------------------------------------------------------------------------------------------------------------------------------------------------------------------------------------------------------------------------------------------------------------------------------------------------------------------------------|---------|
| #1  | exp Mental Disorders/ or exp Mental Health/ or exp Mentally Ill Persons/                                                                                                                                                                                                                                                                                                                                                                                                                                           | 1240016 |
| #2  | ("mental health" or "psychiatric diseas*" or "psychiatric disorder*" or "psychiatric ill*").ti,kw.                                                                                                                                                                                                                                                                                                                                                                                                                 | 68597   |
| #3  | ((mental* adj3 disorder*) or (mental* adj2 ill*) or (mental adj2 disease*)).ti,kw.                                                                                                                                                                                                                                                                                                                                                                                                                                 | 26228   |
| #4  | (schizophren* or schizoaffective or schizotypal or delusional or bipolar or depress* or anxiety or "personality disorder*" or "affective disorder*" or "stress disorder*" or "substance use" or "substance dependence" or (mood adj2 disorder*) or (eating adj2 disorder*) or (delusional adj2 disorder*) or (borderline adj2 disorder*) or (psychotic adj2 disorder*) or manic or phobia or obsessive-compulsive or "alcohol abuse" or "alcohol misuse" or addiction or somatoform or anorexia or bulimia).ti,kw. | 376383  |
| #5  | #1 or #2 or #3 or #4                                                                                                                                                                                                                                                                                                                                                                                                                                                                                               | 1400392 |
| #6  | exp Quality of Life/                                                                                                                                                                                                                                                                                                                                                                                                                                                                                               | 187680  |
| #7  | ("Quality of life" or Wellbeing* or "Patient-reported outcome*" or (Capabilit* adj2 approach) or (Capabilit* adj2 based) or (Capabilit* adj2 measur*) or (Capabilit* adj2 instrument*) or (Capabilit* adj2 framework) or QoL or HRQoL).ti,ab,kw.                                                                                                                                                                                                                                                                   | 296961  |
| #8  | #6 or #7                                                                                                                                                                                                                                                                                                                                                                                                                                                                                                           | 352016  |
| #9  | exp Patient reported outcome measures/                                                                                                                                                                                                                                                                                                                                                                                                                                                                             | 4862    |
| #10 | (patient-reported outcome* or PROM or PROMs).ti,kw.                                                                                                                                                                                                                                                                                                                                                                                                                                                                | 8900    |
| #11 | (self-reported adj3 (outcome* or measure* or instrument* or assess* or questionnair* or scale*)).ti,kw.                                                                                                                                                                                                                                                                                                                                                                                                            | 960     |
| #12 | (patient-reported adj3 (outcome* or measure* or instrument* or assess* or questionnair* or scale*)).ti,kw.                                                                                                                                                                                                                                                                                                                                                                                                         | 5652    |
| #13 | (reported adj3 (outcome* or measure* or instrument* or assess* or questionnair* or scale*)).ti,kw.                                                                                                                                                                                                                                                                                                                                                                                                                 | 7058    |
| #14 | ((outcome* or "quality of life" or wellbeing* or well-being* or recovery or capabilit* or "health state" or "health status") adj4 (measur* or instrument* or assess* or questionna* or scale*)).ti,kw.                                                                                                                                                                                                                                                                                                             | 25541   |
| #15 | #9 or #10 or #11 or #12 or #13 or #14                                                                                                                                                                                                                                                                                                                                                                                                                                                                              | 35887   |
| #16 | #5 and #8 and #15                                                                                                                                                                                                                                                                                                                                                                                                                                                                                                  | 2139    |
| #17 | limit 16 to yr="2008 -Current"                                                                                                                                                                                                                                                                                                                                                                                                                                                                                     | 1577    |

**Table 2.** Scoping review search: previous systematic literature reviews of PROMs and existing PROM databases

| <b>Literature reviews</b> |                          |             |                                                                                                                                                  |                                                                   |
|---------------------------|--------------------------|-------------|--------------------------------------------------------------------------------------------------------------------------------------------------|-------------------------------------------------------------------|
| <b>No.</b>                | <b>Authors</b>           | <b>Year</b> | <b>Title</b>                                                                                                                                     | <b>Disease area/target population</b>                             |
| 1                         | Webb et al.              | 2018        | A systematic review of measures of mental health and emotional wellbeing in parents of children aged 0-5                                         | family /carers                                                    |
| 2                         | Morton et al.            | 2017        | What does quality of life refer to in bipolar disorders research? A systematic review of the construct's definition, usage and measurement       | mental health /bipolar disorder                                   |
| 3                         | Strada et al.            | 2017        | Measuring quality of life in opioid-dependent people: a systematic review of assessment instruments                                              | mental health /opioid dependence                                  |
| 4                         | Linton et al.            | 2016        | Review of 99 self-report measures for assessing well-being in adults: exploring dimensions of well-being and developments over time              | not limited to a disease area                                     |
| 5                         | Cooke et al.             | 2016        | Measuring well-being: A review of instruments                                                                                                    | not limited to a disease area                                     |
| 6                         | Bulamu, et al.           | 2015        | A systematic review of instruments for measuring outcomes in economic evaluation within aged care                                                | older adults /aged care                                           |
| 7                         | Kwan & Rickwood          | 2015        | A systematic review of mental health outcome measures for young people aged 12 to 25 years                                                       | mental health /adolescents                                        |
| 8                         | Aspden et al.            | 2014        | Quality-of-life measures for use within care homes: a systematic review of their measurement properties                                          | older adults /care homes                                          |
| 9                         | Deighton et al.          | 2014        | Measuring mental health and wellbeing outcomes for children and adolescents to inform practice and policy: a review of child self-report measure | mental health /adolescents                                        |
| 10                        | Ikeda et al.             | 2014        | Assessment of quality of life in children and youth with autism spectrum disorder: a critical review                                             | paediatric population /autism spectrum disorders                  |
| 11                        | Makai et al.             | 2014        | Quality of life instruments for economic evaluations in health and social care for older people: a systematic review                             | older adults                                                      |
| 12                        | Prigent et al.           | 2014        | Quality of life instruments used in mental health research: Properties and utilization                                                           | mental health                                                     |
| 13                        | Paltzer et al.           | 2013        | Measuring the health-related quality of life (HRQoL) of young children in resource-limited settings: a review of existing measures               | mental health /adolescents                                        |
| 14                        | Payakachat et al.        | 2012        | Autism spectrum disorders: a review of measures for clinical, health services and cost-effectiveness applications                                | paediatric population /autism spectrum disorders                  |
| 15                        | Townsend-White et al.    | 2012        | Review: a systematic review of quality of life measures for people with intellectual disabilities and challenging behaviours                     | mental health /intellectual disabilities / challenging behaviours |
| 16                        | Hu et al.                | 2011        | The quantitative measurement of family quality of life: a review of available instruments                                                        | family /carers                                                    |
| 17                        | Harvey et al.            | 2008        | A review of instruments developed to measure outcomes for carers of people with mental health problems                                           | family /carers                                                    |
| 18                        | Janssens et al.          | 2008        | Health-related quality-of-life measures for long-term follow-up in children after major trauma                                                   | paediatric population /trauma                                     |
| 19                        | Solans et al.            | 2008        | Health-related quality of life measurement in children and adolescents: a systematic review of generic and disease-specific instruments          | not limited to a disease area /children and adolescents           |
| 20                        | Haywood et al.           | 2006        | Quality of life in older people: a structured review of self-assessed health instruments                                                         | older adults                                                      |
| 21                        | Van Nieuwenhuizen & Wolf | 1997        | Measuring the quality of life of clients with severe mental illness: A review of instruments                                                     | mental health                                                     |

| <b>Online databases</b> |                                                                      |                                      |                                                                                                                                                             |
|-------------------------|----------------------------------------------------------------------|--------------------------------------|-------------------------------------------------------------------------------------------------------------------------------------------------------------|
| No.                     | Name                                                                 | Disease area/target population       | Link                                                                                                                                                        |
| 1                       | PROQOLID; Mapi Research Trust                                        | Not limited to a disease area        | <a href="https://eprovide.mapi-trust.org/catalog">https://eprovide.mapi-trust.org/catalog</a>                                                               |
| 2                       | Common Outcome Measures used in Spinal Cord Injury clinical practice | Spinal Cord Injury                   | <a href="https://scireproject.com/outcome-measures/">https://scireproject.com/outcome-measures/</a>                                                         |
| 3                       | Eular: Tool-Box of Patient Reported Outcomes                         | Rheumatic & musculoskeletal diseases | <a href="http://oml.eular.org/">http://oml.eular.org/</a>                                                                                                   |
| 4                       | Patient Reported Outcomes Measurement Group University of Oxford     | Not limited to a disease area        | <a href="http://phi.uhce.ox.ac.uk/">http://phi.uhce.ox.ac.uk/</a>                                                                                           |
| 5                       | PRiSM; Pediatric Research in Sports Medicine Society                 | Not limited to a disease area        | <a href="https://www.prismsports.org/research/patient-reported-outcome-measures">https://www.prismsports.org/research/patient-reported-outcome-measures</a> |
| 6                       | MIDSS; Measurement Instrument Database for the Social Science        | Not limited to a disease area        | <a href="https://www.midss.org/tools/search">https://www.midss.org/tools/search</a>                                                                         |
| 7                       | Mental Health Partnerships                                           | Mental health                        | <a href="https://mentalhealthpartnerships.com/resource/outcome-measures/">https://mentalhealthpartnerships.com/resource/outcome-measures/</a>               |

**Table 3.** Secondary search strategy

| Step | Source of information                                                                                                                                                               | Information retrieved                                                                                                                                                                                             | Comment                                                         |
|------|-------------------------------------------------------------------------------------------------------------------------------------------------------------------------------------|-------------------------------------------------------------------------------------------------------------------------------------------------------------------------------------------------------------------|-----------------------------------------------------------------|
| 1    | Questionnaire's website                                                                                                                                                             | Name, abbreviation, general information (no. of items, dimensions covered, availability of preference weights, availability of manual, available translations etc.)                                               | If available                                                    |
| 2    | Original reference to questionnaire                                                                                                                                                 | Reference, country of origin, year of development, general information                                                                                                                                            | If not found on a questionnaire's website                       |
| 3    | Google search: 'questionnaire's name' + "pdf"                                                                                                                                       | Online available pdf of a scale                                                                                                                                                                                   | If not found on a questionnaire's website                       |
| 4    | PubMed, Google Scholar, Google Books: 'questionnaire's name'                                                                                                                        | Remaining missing general information about a PROM                                                                                                                                                                | If not found on a questionnaire's website                       |
| 5    | PubMed and Google Scholar: "preference weights", "value set", "mapping" + 'questionnaire's name'                                                                                    | Availability of preference weights and mapping studies                                                                                                                                                            | If not found on a questionnaire's website or Original reference |
| 6    | PubMed, Google Scholar, Google Books: "scoring" + 'questionnaire's name'                                                                                                            | Scoring information                                                                                                                                                                                               | If not found on a questionnaire's website or Original reference |
| 7    | PubMed and Google Scholar: "languages", "translations" + 'questionnaire's name'                                                                                                     | Finding either the list of translations/language versions for the instrument or articles describing the use of the questionnaire in countries different that the country of origin                                | If not found on a questionnaire's website                       |
| 8    | Google: 'questionnaire's name' + "digital/online/computer/e-version"                                                                                                                | Availability of e-version                                                                                                                                                                                         | If not found on a questionnaire's website                       |
| 9    | Google: 'questionnaire's name' + "manual"                                                                                                                                           | Availability of a manual                                                                                                                                                                                          | If not found on a questionnaire's website                       |
| 10   | Google: 'questionnaire's name' + "licence", "registration", "terms of use"                                                                                                          | Terms of use                                                                                                                                                                                                      | If not found on a questionnaire's website                       |
| 11   | PubMed: 'questionnaire's name' -> count hits                                                                                                                                        | Frequency of use                                                                                                                                                                                                  |                                                                 |
| 12   | PubMed: "psychometric validation", "validity", "reliability", "responsiveness" + 'questionnaire's name' + keywords related to 'mental health', e.g. depression, schizophrenia, etc. | Availability of studies investigating psychometric validation in mental health research field in general or specific mental health disease areas, e.g. depression, schizophrenia, PTSD, other psychiatric disease |                                                                 |

**Table 4.** Instruments included in the PECUNIA PROM-MH Compendium

| Questionnaire (Abbreviation)     | Source <sup>1</sup> | Questionnaire (Long name)                                                                                                                     | Type of measure            | Age group             | Reference to instrument construction |
|----------------------------------|---------------------|-----------------------------------------------------------------------------------------------------------------------------------------------|----------------------------|-----------------------|--------------------------------------|
| <b>15D</b>                       | BD                  | 15D instrument of health-related quality of life                                                                                              | Generic                    | Adults                | (1, 2)                               |
| <b>16D</b>                       | BD                  | 16D instrument of health-related quality of life                                                                                              | Generic                    | Adolescents           | (3)                                  |
| <b>17D</b>                       | version             | 17D instrument of health-related quality of life                                                                                              | Generic                    | Children              | (4)                                  |
| <b>5F-Wei Adult (FFWEL)</b>      | SR                  | Five Factor Wellness Evaluation of Lifestyle                                                                                                  | Generic                    | Adults                | (5, 6)                               |
| <b>5F-Wei Elementary (FFWEL)</b> | SR                  | Five Factor Wellness Evaluation of Lifestyle                                                                                                  | Generic                    | Children              | (7)                                  |
| <b>5F-Wei Teen (FFWEL)</b>       | SR                  | Five Factor Wellness Evaluation of Lifestyle                                                                                                  | Generic                    | Adolescents           | (7)                                  |
| <b>ACQ-CMH/CQ-CMH</b>            | BD                  | (Achieved) Capabilities Questionnaire for Community Mental Health                                                                             | Designed for mental health | Adults                | (8)                                  |
| <b>AC-QoL</b>                    | BD                  | Adult Carer Quality of Life                                                                                                                   | Generic                    | Adults                | (9)                                  |
| <b>AHUM</b>                      | SR                  | Adolescent Health Utility Measure                                                                                                             | Generic                    | Children, Adolescents | (10)                                 |
| <b>AQoL-4D</b>                   | BD                  | Assessment of Quality of Life Scale                                                                                                           | Generic                    | Adults                | (11)                                 |
| <b>AQoL-6D</b>                   | version             | Assessment of Quality of Life (AQoL)-6D                                                                                                       | Generic                    | Adults, Adolescents   | (12)                                 |
| <b>AQoL-7D</b>                   | version             | Assessment of Quality of Life (AQoL)-7D                                                                                                       | Generic                    | Adults                | (13)                                 |
| <b>AQoL-8D</b>                   | BD                  | Assessment of Quality of Life (AQoL)-8D                                                                                                       | Generic                    | Adults                | (14, 15)                             |
| <b>AQOL-MHS</b>                  | BD                  | Adolescent Quality of Life-Mental Health Scale                                                                                                | Designed for mental health | Adolescents           | (16)                                 |
| <b>ASCOT – Easy Read version</b> | version             | Easy Read Version of the Adult Social Care Outcomes Toolkit                                                                                   | Generic                    | Adults                | (17)                                 |
| <b>ASCOT – Proxy version</b>     | version             | Proxy-report version of the Adult Social Care Outcomes Toolkit                                                                                | Generic                    | Adults                | (18)                                 |
| <b>ASCOT-Carer</b>               | version             | Carer Version of Adult Social Care Outcomes Toolkit                                                                                           | Generic                    | Adults                | (19)                                 |
| <b>ASCOT-SCT4</b>                | BD                  | Adult Social Care Outcomes Toolkit                                                                                                            | Generic                    | Adults                | (20)                                 |
| <b>AUQUEI</b>                    | BD                  | Pictured Child's Quality of Life Self Questionnaire (In French: Autoquestionnaire de qualité de vie enfant imagé)                             | Generic                    | Children, Adolescents | (21)                                 |
| <b>BBC-SWB</b>                   | SR                  | BBC Subjective Well-Being Scale                                                                                                               | Generic                    | Adults                | (22)                                 |
| <b>BELP</b>                      | BD                  | Berliner Lebensqualitätsprofil (German version of the Lancashire Quality of Life Profile)                                                     | Designed for mental health | Adults                | (23)                                 |
| <b>BELP-KF</b>                   | version             | Short form of Berliner Lebensqualitätsprofil - an interview-administered measure of quality of life in adults Berliner Lebensqualitätsprofils | Designed for mental health | Adults                | (24)                                 |
| <b>Cantril Ladder</b>            | SR                  | Cantril's Self-Anchoring Ladder of Life Satisfaction                                                                                          | Generic                    | Adults                | (25)                                 |

<sup>1</sup> BD: bibliographic database search; SR: scoping review

|                                |         |                                                                                                     |                            |                       |          |
|--------------------------------|---------|-----------------------------------------------------------------------------------------------------|----------------------------|-----------------------|----------|
| <b>CA-QOL</b>                  | SR      | California Quality of Life                                                                          | Generic                    | Adults                | (26, 27) |
| <b>CarerQoL</b>                | BD      | Care-related Quality of Life instrument                                                             | Generic                    | Adults                | (28)     |
| <b>CASP-12</b>                 | version | Control, Autonomy, Self-realisation and Pleasure scale-short                                        | Generic                    | Old                   | (29, 30) |
| <b>CASP-19</b>                 | BD      | Control, Autonomy, Self-realisation and Pleasure scale                                              | Generic                    | Old                   | (31)     |
| <b>CDC HRQOL-14</b>            | BD      | Centers for Disease Control and Prevention Health-Related Quality of Life Measure                   | Generic                    | Adults                | (32)     |
| <b>CHIP-AE</b>                 | version | Child Health and Illness Profile – Adolescent Edition                                               | Generic                    | Adolescents           | (33)     |
| <b>CHIP-CE</b>                 | BD      | Child Health and Illness Profile – Child Edition                                                    | Generic                    | Children              | (34)     |
| <b>CHIP-CE/PRF</b>             | BD      | Child Health and Illness Profile Child-Edition, Parent Report Form                                  | Generic                    | Children              | (35)     |
| <b>CHQ-CF45</b>                | version | Child Health Questionnaire-Child Form 45                                                            | Generic                    | Children, Adolescents | (36)     |
| <b>CHQ-CF87</b>                | SR      | Child Health Questionnaire-Child Form 87                                                            | Generic                    | Children, Adolescents | (37)     |
| <b>CHQ-PF28</b>                | SR      | Child Health Questionnaire-Parent Form 28                                                           | Generic                    | Children, Adolescents | (38, 39) |
| <b>CHQ-PF50</b>                | BD      | Child Health Questionnaire-Parent Form 50                                                           | Generic                    | Children, Adolescents | (38, 40) |
| <b>CHRIs</b>                   | SR      | Child Health Rating Inventories                                                                     | Generic                    | Children              | (41)     |
| <b>CHSCS-PS/HSCS-PS</b>        | SR      | Comprehensive Health Status Classification System – Preschool                                       | Generic                    | Children              | (42-44)  |
| <b>CHU9D</b>                   | BD      | Child Health Utility 9D                                                                             | Generic                    | Children, Adolescents | (45)     |
| <b>CLQI</b>                    | SR      | Children’s Life Quality Index                                                                       | Generic                    | Children              | (46)     |
| <b>COMPAS-W</b>                | BD      | COMPAS-W 26-item scale of wellbeing                                                                 | Generic                    | Adults                | (47)     |
| <b>CQLI</b>                    | SR      | Client’s Quality of Life Scale                                                                      | Generic                    | Children              | (48)     |
| <b>CQOL</b>                    | SR      | Child Quality of Life Questionnaire                                                                 | Generic                    | Children              | (49)     |
| <b>CS-Base</b>                 | BD      | Chateau Sante Base                                                                                  | Generic                    | Adults                | (50)     |
| <b>CWS</b>                     | BD      | Carer well-being and support questionnaire                                                          | Designed for mental health | Adults                | (51)     |
| <b>DHP</b>                     | SR      | Duke health profile                                                                                 | Generic                    | Adults                | (52)     |
| <b>DHP-8</b>                   | version | Duke health profile-8                                                                               | Generic                    | Adults                | (52)     |
| <b>DHP-A</b>                   | SR      | DUKE Health Profile—Adolescent Version                                                              | Generic                    | Adolescents           | (53)     |
| <b>DISABKIDS Smiley TAKE 6</b> | version | DISABKIDS smiley questionnaire                                                                      | Generic                    | Children              | (54)     |
| <b>DISABKIDS-37/DCGM-37</b>    | SR      | DISABKIDS Chronic Generic Module                                                                    | Generic                    | Children, Adolescents | (55)     |
| <b>EFQ</b>                     | BD      | Everyday Feeling Questionnaire                                                                      | Designed for mental health | Adults                | (56)     |
| <b>EHRQL</b>                   | SR      | Exeter Health-Related Quality of Life Measure                                                       | Generic                    | Children              | (57)     |
| <b>EQ-5D-3L</b>                | BD      | EuroQoL Five Dimensions 3L                                                                          | Generic                    | Adults                | (58)     |
| <b>EQ-5D-5L</b>                | BD      | EuroQoL Five Dimensions 5L                                                                          | Generic                    | Adults                | (59)     |
| <b>EQ-5D-Y</b>                 | BD      | EuroQoL five dimensions questionnaire (youth)                                                       | Generic                    | Children, Adolescents | (60)     |
| <b>EUROHIS-QoL</b>             | BD      | 8-item Quality of Life scale                                                                        | Generic                    | Adults                | (61)     |
| <b>FACIT-Sp</b>                | version | Functional Assessment of Chronic Illness Therapy–Spiritual Well-Being Scale                         | Generic                    | Adults                | (62)     |
| <b>FACIT-Sp-12</b>             | BD      | Functional Assessment of Chronic Illness Therapy - Spiritual Well-Being                             | Generic                    | Adults                | (62)     |
| <b>FLZ</b>                     | SR      | Fragen zur Lebenszufriedenheit (modules "General life satisfaction" and "Satisfaction with Health") | Generic                    | Adults                | (63)     |
| <b>FMWB</b>                    | SR      | Family Member Well-Being Index                                                                      | Generic                    | Adults                | (64)     |

|                                   |         |                                                                                                                                      |                            |                       |          |
|-----------------------------------|---------|--------------------------------------------------------------------------------------------------------------------------------------|----------------------------|-----------------------|----------|
| <b>FQoL</b>                       | BD      | Family Quality of Life Scale                                                                                                         | Generic                    | Adults                | (65)     |
| <b>FS</b>                         | BD      | Flourishing Scale                                                                                                                    | Generic                    | Adults                | (66)     |
| <b>GCCQ</b>                       | SR      | Generic Children's Quality of Life Measure                                                                                           | Generic                    | Children, Adolescents | (67, 68) |
| <b>GQL</b>                        | BD      | Global Quality of Life Scale-Visual Analogue Scale                                                                                   | Generic                    | Adults                | (69)     |
| <b>GSI</b>                        | BD      | General Satisfaction Index                                                                                                           | Generic                    | Adults                | (70)     |
| <b>GWB</b>                        | BD      | General Well-Being Schedule                                                                                                          | Generic                    | Adults                | (71)     |
| <b>HLQ</b>                        | SR      | Herdecke Questionnaire for Quality of Life                                                                                           | Generic                    | Adults                | (72, 73) |
| <b>HUI-1</b>                      | SR      | Health Utilities Index                                                                                                               | Generic                    | Adults                | (74)     |
| <b>HUI-2</b>                      | BD      | Health Utilities Index Mark 2                                                                                                        | Generic                    | Adults                | (75)     |
| <b>HUI-3</b>                      | BD      | Health Utilities Index Mark 3                                                                                                        | Generic                    | Adults                | (76)     |
| <b>ICECAP-A</b>                   | BD      | ICEpop CAPability measure for Adults                                                                                                 | Generic                    | Adults                | (77)     |
| <b>ICECAP-O</b>                   | BD      | ICEpop CAPability measure for Older population                                                                                       | Generic                    | Old                   | (78)     |
| <b>ILK</b>                        | BD      | Intenventar zur Erfassung der Lebensqualität Kindern und Jugendlichen (ILK: Measure of Quality of Life for Children and Adolescents) | Generic                    | Children, Adolescents | (79)     |
| <b>IQI</b>                        | version | Infant Quality of Life Instrument                                                                                                    | Generic                    | Children              | (80)     |
| <b>ITQOL</b>                      | SR      | Infant and Toddler Quality of Life Questionnaire                                                                                     | Generic                    | Children              | (81, 82) |
| <b>ITQOL-SF47</b>                 | version | Infant and Toddler Quality of Life Questionnaire - Short form                                                                        | Generic                    | Children              | (81, 83) |
| <b>KIDSCREEN-10-index</b>         | BD      | KIDSCREEN-10-Index                                                                                                                   | Generic                    | Children, Adolescents | (84)     |
| <b>KIDSCREEN-27</b>               | BD      | KIDSCREEN-27-Index                                                                                                                   | Generic                    | Children, Adolescents | (84)     |
| <b>KIDSCREEN-52</b>               | BD      | KIDSCREEN-52-Index                                                                                                                   | Generic                    | Children, Adolescents | (84)     |
| <b>KINDL-R</b>                    | BD      | Questionnaire for Measuring HRQoL in Children and Adolescents-Revised                                                                | Generic                    | Children, Adolescents | (85)     |
| <b>LEIPAD</b>                     | BD      | Leiden-Padua Questionnaire                                                                                                           | Generic                    | Old                   | (86)     |
| <b>LiSat-11</b>                   | BD      | Life Satisfaction Questionnaire                                                                                                      | generic                    | Adults                | (87)     |
| <b>LQoL Short / QOLI-BV</b>       | version | Lehman's Quality of Life Interview Brief Version                                                                                     | Designed for mental health | Adults                | (88)     |
| <b>LQoL/QOLI</b>                  | BD      | Lehman's Quality of Life Interview                                                                                                   | Designed for mental health | Adults                | (89)     |
| <b>LQOLP</b>                      | BD      | Lancashire Quality of Life Profile                                                                                                   | Generic                    | Adults                | (90)     |
| <b>LQoL-TL-30</b>                 | BD      | Lehman Quality of Life Interview-Short Version (TL-30)                                                                               | Designed for mental health | Adults                | (91)     |
| <b>LS-life-satisfaction-scale</b> | BD      | LS-life-satisfaction-scale                                                                                                           | Generic                    | Adults                | (92, 93) |
| <b>MANSA</b>                      | BD      | Manchester Short Assessment of Quality of Life                                                                                       | Generic                    | Adults                | (94)     |
| <b>MCQLI</b>                      | BD      | Multicultural Quality of Life Index                                                                                                  | Generic                    | Adults                | (95)     |
| <b>MHC-SF</b>                     | BD      | Mental Health Continuum Short Form Adult                                                                                             | Designed for mental health | Adults                | (96)     |
| <b>MHIQ</b>                       | SR      | McMaster Health Index Questionnaire                                                                                                  | Generic                    | Adults                | (97)     |

|                                        |         |                                                                                            |                            |                       |          |
|----------------------------------------|---------|--------------------------------------------------------------------------------------------|----------------------------|-----------------------|----------|
| <b>MHRM</b>                            | BD      | Mental Health Recovery Measure                                                             | Designed for mental health | Adults                | (98, 99) |
| <b>MHRM-10</b>                         | version | Mental Health Recovery Measure-Brief                                                       | Designed for mental health | Adults                | (100)    |
| <b>Mini-SeRvE</b>                      | BD      | Mini-Service user Recovery Evaluation scale                                                | Designed for mental health | Adults                | (101)    |
| <b>MLDL</b>                            | SR      | Munich List of Life Dimensions                                                             | Generic                    | Adults                | (102)    |
| <b>MLQ</b>                             | BD      | Meaning in Life Questionnaire                                                              | Generic                    | Adults                | (103)    |
| <b>MLQ-SF</b>                          | version | Meaning in Life Questionnaire – Short Form                                                 | Generic                    | Adults                | (104)    |
| <b>MPS</b>                             | SR      | Mental Physical Spiritual Well-Being Scale                                                 | Generic                    | Adults                | (105)    |
| <b>MSQoL</b>                           | SR      | Modular System for Quality of Life                                                         | Designed for mental health | Adults                | (106)    |
| <b>MyQualityOfLife.nl</b>              | BD      | MyQualityOfLife.nl                                                                         | Generic                    | Adults                | (107)    |
| <b>NHP</b>                             | BD      | Nottingham Health Profile                                                                  | Generic                    | Adults                | (108)    |
| <b>OHQ</b>                             | SR      | Oxford Happiness Questionnaire                                                             | Generic                    | Adults                | (109)    |
| <b>OPQOL-35</b>                        | SR      | Older People's Quality of Life                                                             | Generic                    | Old                   | (110)    |
| <b>OPQOL-Brief</b>                     | version | Older People's Quality of Life Brief Version                                               | Generic                    | Old                   | (111)    |
| <b>OQ-45</b>                           | BD      | Outcome Questionnaire 45                                                                   | Designed for mental health | Adults                | (112)    |
| <b>OxCAP-MH</b>                        | BD      | Oxford Capabilities Questionnaire – Mental Health                                          | Designed for mental health | Adults                | (113)    |
| <b>PedsQL</b>                          | BD      | Pediatric Quality of Life Inventory 4.0 Generic Core Scales                                | Generic                    | Children, Adolescents | (114)    |
| <b>PedsQL 4.0 SF15</b>                 | BD      | Pediatric quality of Life Inventory 4.0 Short Form 15 Generic Core Scales                  | Generic                    | Children, Adolescents | (115)    |
| <b>PedsQL Family Impact Module</b>     | SR      | Pediatric Quality of Life Inventory Family Impact Module                                   | Generic                    | Adults                | (116)    |
| <b>PedsQL General Well-Being Scale</b> | SR      | Pediatric Quality of Life Inventory™ General Well-Being Scale                              | Generic                    | Children, Adolescents | (117)    |
| <b>PedsQL VAS</b>                      | SR      | Pediatric Quality of Life Inventory™ Pediatric Present Functioning Visual Analogue Scales  | Generic                    | Children, Adolescents | (118)    |
| <b>PGI</b>                             | SR      | Patient-Generated Index                                                                    | Generic                    | Adults                | (119)    |
| <b>PGWBI</b>                           | SR      | Psychological General Wellbeing Index                                                      | Generic                    | Adults                | (120)    |
| <b>PHI</b>                             | SR      | Pemperton Happiness Index                                                                  | Generic                    | Adults                | (121)    |
| <b>PHS-WB</b>                          | SR      | Public Health Surveillance Well-Being Scale                                                | Generic                    | Adults                | (122)    |
| <b>PMH</b>                             | SR      | Positive Mental Health instrument                                                          | Generic                    | Adults                | (123)    |
| <b>PMH-20</b>                          | version | Positive Mental Health instrument - Short version                                          | Generic                    | Adults                | (124)    |
| <b>PMSW-21</b>                         | SR      | Physical, Mental and Social Well-Being Scale                                               | Generic                    | Adults                | (125)    |
| <b>PQ-LES-Q</b>                        | BD      | Pediatric Quality of Life Enjoyment and Satisfaction Questionnaire (Endicott et al., 2006) | Generic                    | Children, Adolescents | (126)    |
| <b>PQoL</b>                            | SR      | Perceived Quality of Life scale                                                            | Generic                    | Adults                | (127)    |
| <b>PROM</b>                            | BD      | Personal Recovery Outcome Measurement                                                      | Designed for mental health | Adults                | (128)    |
| <b>PROMIS</b>                          | BD      | Patient-Reported Outcomes Measurement Information System                                   | Generic                    | Adults                | (129)    |
| <b>PTQL</b>                            | BD      | Pictorial Thai Quality of Life                                                             | Designed for mental health | Adults                | (130)    |
| <b>PWB (18-item)</b>                   | BD      | 18-item Psychological well-being Scale                                                     | Generic                    | Adults                | (131)    |



|                      |         |                                                                       |                            |                          |            |
|----------------------|---------|-----------------------------------------------------------------------|----------------------------|--------------------------|------------|
| <b>PWB (42-item)</b> | version | 42-item Psychological well-being Scale                                | Generic                    | Adults                   | (131)      |
| <b>PWI-A</b>         | BD      | Personal Wellbeing Index-Adult                                        | Generic                    | Adults                   | (132)      |
| <b>PWI-SC</b>        | version | Personal Wellbeing Index – School Children                            | Generic                    | Children,<br>Adolescents | (133)      |
| <b>QEWB</b>          | BD      | Questionnaire for Eudaimonic Well-Being                               | Generic                    | Adults,<br>Adolescents   | (134)      |
| <b>Q-LES-Q</b>       | BD      | Quality of Life Enjoyment and Satisfaction Questionnaire              | Generic                    | Adults                   | (135)      |
| <b>Q-LES-Q-18</b>    | SR      | Quality of Life Enjoyment and Satisfaction Questionnaire 18 Item      | Generic                    | Adults                   | (136)      |
| <b>Q-LES-Q-SF</b>    | BD      | Quality of Life Enjoyment and Satisfaction Questionnaire Short Form   | Generic                    | Adults                   | (135)      |
| <b>QLI</b>           | SR      | Ferrans and Powers Quality of Life Index                              | Generic                    | Adults                   | (137, 138) |
| <b>QLQ-IR</b>        | SR      | Oregon Quality of Life Questionnaire - Interviewer rating version     | Designed for mental health | Adults                   | (139)      |
| <b>QLQ-RSR</b>       | SR      | Oregon Quality of Life Questionnaire - Respondent self-report version | Designed for mental health | Adults                   | (140)      |
| <b>QLS-100</b>       | SR      | Quality of Life Self-Assessment Inventory                             | Generic                    | Adults                   | (141, 142) |
| <b>QLSI</b>          | BD      | Quality of Life Systemic Inventory                                    | Generic                    | Adults                   | (143)      |
| <b>QoL-10</b>        | BD      | Quality of life - 10                                                  | Generic                    | Adults                   | (144)      |
| <b>QoL-5</b>         | BD      | Quality of life - 5                                                   | Generic                    | Adults                   | (145)      |
| <b>QOLI</b>          | BD      | Quality of Life Inventory                                             | Generic                    | Adults                   | (146)      |
| <b>QOLMD</b>         | BD      | Quality of Life for Mental Disorders, Chinese                         | Designed for mental health | Adults                   | (147)      |
| <b>QoL-ME</b>        | BD      | QoL-instrument for people with severe mental health problems          | Designed for mental health | Adults                   | (148)      |
| <b>QOLP</b>          | version | Quality of Life Profile—Adult Version                                 | Generic                    | Adults                   | (149)      |
| <b>QoL-P</b>         | SR      | Quality of Life for Proxies                                           | Generic                    | Adults                   | (150)      |
| <b>QOLP-AV</b>       | SR      | Quality of Life Profile—Adolescent Version                            | Generic                    | Adolescents              | (151)      |
| <b>QOLS</b>          | BD      | Quality of Life Scale                                                 | Generic                    | Adults                   | (152)      |
| <b>QPR</b>           | BD      | Questionnaire about the Process of Recovery                           | Designed for mental health | Adults                   | (153)      |
| <b>QUALIN</b>        | SR      | Infant Quality of Life/QUALItt de vie du Nourrisson                   | Generic                    | Children                 | (154)      |
| <b>QWB-IA</b>        | BD      | Quality of Well-Being Interview-Administered                          | Generic                    | Adults                   | (155)      |
| <b>QWB-SA</b>        | BD      | Quality of Well-Being Self-Administered                               | Generic                    | Adults                   | (156)      |
| <b>RAS</b>           | BD      | Recovery Assessment Scale                                             | Designed for mental health | Adults                   | (157, 158) |
| <b>RAS-R</b>         | version | Recovery Assessment Scale-revised                                     | Designed for mental health | Adults                   | (159)      |
| <b>ReQoL-10</b>      | BD      | Recovering Quality of Life-10                                         | Designed for mental health | Adults                   | (160, 161) |
| <b>ReQoL-20</b>      | BD      | Recovering quality of life                                            | Designed for mental health | Adults                   | (162)      |
| <b>ReQuest-YP</b>    | BD      | Recovery Questionnaire for Young People                               | Designed for mental health | Adolescents              | (163)      |

|                          |         |                                                                                    |                            |                       |                |
|--------------------------|---------|------------------------------------------------------------------------------------|----------------------------|-----------------------|----------------|
| <b>RGPS</b>              | BD      | Recovery Group Participation Scale                                                 | Designed for mental health | Adults                | (164)          |
| <b>RPRS</b>              | BD      | Recovery Promoting Relationships Scale                                             | Designed for mental health | Adults                | (165)          |
| <b>RSA</b>               | BD      | Recovery Self-Assessment                                                           | Designed for mental health | Adults                | (166)          |
| <b>RSA-B</b>             | BD      | Recovery Self-Assessment-Brief                                                     | Designed for mental health | Adults                | (167)          |
| <b>RSQ</b>               | BD      | Recovery Style Questionnaire                                                       | Designed for mental health | Adults                | (168)          |
| <b>SEIQoL</b>            | BD      | Schedule for the Evaluation of Individual Quality of Life                          | Generic                    | Adults                | (169)          |
| <b>SEIQoL-DW</b>         | version | SEIQoL-Direct Weighting method                                                     | Generic                    | Adults                | (170)          |
| <b>SEIQoL-Q</b>          | version | SEIQoL-Questionnaire                                                               | Generic                    | Adults                | (171)          |
| <b>SEQOL</b>             | SR      | Self-Evaluated Quality Of Life Questionnaire                                       | Generic                    | Adults                | (172)          |
| <b>SeRvE</b>             | BD      | Service-user Recovery Evaluation                                                   | Designed for mental health | Adults                | (173)          |
| <b>SF-12</b>             | BD      | 12-Item Short Form Health Survey                                                   | Generic                    | Adults                | (174)          |
| <b>SF-20</b>             | SR      | 20-Item Short Form                                                                 | Generic                    | Adults                | (175)          |
| <b>SF-36</b>             | BD      | 36-Item Short Form, currently used SF-36v2                                         | Generic                    | Adults                | (176)          |
| <b>SF-6D</b>             | BD      | Short Form 6 Dimension                                                             | Generic                    | Adults                | (177)          |
| <b>SF-8</b>              | BD      | Short Form 8                                                                       | Generic                    | Adults                | (178)          |
| <b>SHS</b>               | BD      | Subjective Happiness Scale                                                         | Generic                    | Adults                | (179)          |
| <b>SIWB</b>              | BD      | Spirituality Index of Well-Being                                                   | Generic                    | Adults                | (180)          |
| <b>SLDS</b>              | BD      | Satisfaction with Life Domains Scale                                               | Generic                    | Adults                | (181)          |
| <b>SOS-10</b>            | BD      | Schwartz Outcome Scale (10-item scale)                                             | Designed for mental health | Adults                | (182)          |
| <b>SPF-ILs/SPF-IL-58</b> | SR      | Social Production Function-IL                                                      | Generic                    | Adults                | (183)          |
| <b>SQLI</b>              | SR      | Spitzer Quality of Life Index                                                      | Generic                    | Adults                | (184)          |
| <b>SQLP</b>              | SR      | Subjective Quality of Life Profile                                                 | Generic                    | Adults                | (185, 186)     |
| <b>SWBQ</b>              | BD      | Spiritual Well-Being Questionnaire                                                 | Generic                    | Adults, Adolescents   | (187)          |
| <b>SWBS</b>              | BD      | Spiritual Well-Being Scale                                                         | Generic                    | Adults                | (188)<br>(189) |
| <b>SWEMWBS</b>           | BD      | Warwick-Edinburgh Mental Well-Being Scale-Short                                    | Generic                    | Adults, Adolescents   | (190)          |
| <b>SWLS</b>              | BD      | Satisfaction With Life Scale                                                       | Generic                    | Adults                | (191)          |
| <b>SWN</b>               | BD      | Scale to Measure Subjective Well-being under Neuroleptic Treatment                 | Designed for mental health | Adults                | (192)          |
| <b>SWN-K</b>             | BD      | Scale to Measure Subjective Well-being under Neuroleptic Treatment – short version | Designed for mental health | Adults                | (193)          |
| <b>SWS</b>               | BD      | Social Well-being Scale                                                            | Generic                    | Adults                | (194)          |
| <b>TAAQOL</b>            | SR      | The TNO-AZL Questionnaire for Adult's Health-Related Quality of Life               | Generic                    | Adults                | (195, 196)     |
| <b>TACQOL-CF</b>         | SR      | TNO-AZL Child Quality of Life Children Form                                        | Generic                    | Children, Adolescents | (197, 198)     |
| <b>TACQOL-PF</b>         | SR      | TNO-AZL Child Quality of Life Parent Form                                          | Generic                    | Children              | (199)          |
| <b>TEAQV</b>             | SR      | Tableau d'Evaluation Assistée de la Qualité de Vie                                 | Generic                    | Adults                | (200)          |

|                                          |         |                                                          |                            |                     |            |
|------------------------------------------|---------|----------------------------------------------------------|----------------------------|---------------------|------------|
| <b>TedQL</b>                             | SR      | Quality of Life measure for children aged 3–8 years      | Generic                    | Children            | (201)      |
| <b>The Quality of Life Questionnaire</b> | SR      | The Quality of Life Questionnaire                        | Generic                    | Adults              | (202)      |
| <b>TooL</b>                              | BD      | Tolerability and quality Of Life                         | Designed for mental health | Adults              | (203)      |
| <b>TQOLQA</b>                            | SR      | Taiwanese Quality of Life Questionnaire for Adolescents  | Generic                    | Adolescents         | (204)      |
| <b>VSP-A</b>                             | BD      | Vecú et Sante Perçue de l'Adolescent                     | Generic                    | Adolescents         | (205, 206) |
| <b>VSP-A12</b>                           | version | Vecú et Sante Perçue de l'Adolescent - Short             | Generic                    | Adolescents         | (207)      |
| <b>WEMWBS</b>                            | BD      | Warwick-Edinburgh Mental Well Being Scale                | Generic                    | Adults, Adolescents | (208)      |
| <b>WHO-10</b>                            | SR      | WHO-Ten Well-Being Index                                 | Generic                    | Adults              | (209)      |
| <b>WHO-5</b>                             | BD      | WHO Well-being Index 5                                   | Generic                    | Adults, Adolescents | (210, 211) |
| <b>WHOQOL-100</b>                        | BD      | The World Health Organization Quality of Life Assessment | Generic                    | Adults              | (212)      |
| <b>WHOQOL-BREF</b>                       | BD      | 26-item version WHO Quality of Life Measure              | Generic                    | Adults              | (213)      |
| <b>WHOQOL-Old</b>                        | BD      | WHO-Qol Old                                              | Generic                    | Old                 | (214)      |
| <b>WPS</b>                               | SR      | Well-Being Picture Scale                                 | Generic                    | Adults              | (215)      |
| <b>WPS-CV</b>                            | version | Well-Being Picture Scale-Children's Version              | Generic                    | Children            | (216)      |
| <b>W-QOLI</b>                            | BD      | Wisconsin Quality of Life index                          | Designed for mental health | Adults              | (217, 218) |
| <b>YAQOL</b>                             | SR      | Quality of Life Instrument for Young Adults              | Generic                    | Young adults        | (219)      |
| <b>YQOL-R</b>                            | SR      | Youth Quality of Life Instrument - Research Version      | Generic                    | Adolescents         | (220)      |
| <b>YQOL-SF</b>                           | version | Youth Quality of Life Instrument - Short Version         | Generic                    | Adolescents         | (220, 221) |

Note: BD – bibliographic database search; SR – scoping review; version – version of questionnaires identified through the extraction process

**Table 5.** Mental health validation studies identified for the list of PROMs (as of April 2020).

| Disease area                                                                 | Validated measures (with references to the relevant studies)                                                                                                                                                                                                                                                                                                                                                                                                                                                                                                                                                                  |
|------------------------------------------------------------------------------|-------------------------------------------------------------------------------------------------------------------------------------------------------------------------------------------------------------------------------------------------------------------------------------------------------------------------------------------------------------------------------------------------------------------------------------------------------------------------------------------------------------------------------------------------------------------------------------------------------------------------------|
| <b>Anxiety disorders</b>                                                     | EQ-5D-3L (222); EQ-5D-5L (222); FS (223); PMH (224); QOLIQOL (225); ReQuest-YP (163); RSQ (226); SeRvE (227); SWEMWBS (228)                                                                                                                                                                                                                                                                                                                                                                                                                                                                                                   |
| <b>Bipolar disorder</b>                                                      | ACQ-CMH (229); MLQ (230); Q-LES-Q-18 (136); TooL (231)                                                                                                                                                                                                                                                                                                                                                                                                                                                                                                                                                                        |
| <b>Conduct disorder</b>                                                      | AQOL-MHS (232)                                                                                                                                                                                                                                                                                                                                                                                                                                                                                                                                                                                                                |
| <b>Depression</b>                                                            | ACQ-CMH (229); AQOL-MHS (232); DHP (233); EFQ (234); EQ-5D-3L (235); EQ-5D-5L (222); FS (223); HUI-2 (236); HUI-3 (236, 237); ICECAP-A (238); LS-life-satisfaction-scale (239); MHC-SF (240); MLQ (230); MSQoL (106, 241); OPQOL-35 (242); PGWBI (243); PMH (224, 244); PROMIS (245-247); PQ-LES-Q (126); Q-LES-Q (135); Q-LES-Q-18 (136); QLS-100 (248); QOLIQOL (225); QWB-SA (249); ReQuest-YP (163); RSQ (226); SeRvE (227); SF-12 (250); SF-36 (235); SF-6D (251-253); SHS (254); SQLP (255); SWEMWBS (228); WHO-5 (256, 257); WHOQOL-100 (258); WHOQOL-BREF (259, 260)                                                  |
| <b>Eating disorders</b>                                                      | SEIQoL (261); SEIQoL-DW (261);                                                                                                                                                                                                                                                                                                                                                                                                                                                                                                                                                                                                |
| <b>Generalized anxiety disorder</b>                                          | AQOL-MHS (232); CASP-19 (262)                                                                                                                                                                                                                                                                                                                                                                                                                                                                                                                                                                                                 |
| <b>Obsessive-compulsive disorder</b>                                         | PQ-LES-Q (263)                                                                                                                                                                                                                                                                                                                                                                                                                                                                                                                                                                                                                |
| <b>Oppositional defiant disorder</b>                                         | AQOL-MHS (232)                                                                                                                                                                                                                                                                                                                                                                                                                                                                                                                                                                                                                |
| <b>Panic disorder</b>                                                        | PGWBI (264)                                                                                                                                                                                                                                                                                                                                                                                                                                                                                                                                                                                                                   |
| <b>Personality disorder</b>                                                  | EQ-5D-3L (235); SEIQoL-DW (265); YAQOL(266)                                                                                                                                                                                                                                                                                                                                                                                                                                                                                                                                                                                   |
| <b>Post-traumatic stress disorder</b>                                        | EQ-5D-3L (267); FACIT-Sp-12 (268); QWB-SA (267); SF-36 (269, 270)                                                                                                                                                                                                                                                                                                                                                                                                                                                                                                                                                             |
| <b>Social phobia</b>                                                         | QOLQOL (271)                                                                                                                                                                                                                                                                                                                                                                                                                                                                                                                                                                                                                  |
| <b>Schizophrenia, psychosis</b>                                              | ACQ-CMH (229); BELP-KF (24); DHP (272); EQ-5D-3L (273); GQL (274); HUI-3(237, 275); LQoL (276); LQOLPQOL (277); MHC-SF (278); MHRM (279); MHRM-10 (100); MLDL (280); MLQ (230); MSQoL (106, 241); OxCAP-MH (281); PGWBI (282); PMH (224); Q-LES-Q (283); Q-LES-Q-18 (136); Q-LES-Q-SF (283); QLI (284, 285); QLS-100 (286); QOLMDQOL (287, 288); QPR (289); QWB-SA (290); RAS (291); RSA (292, 293); RSQ (168); SF-12 (294); SF-36 (295, 296); SF-6D (253, 297, 298); SLDS (299); SQLP (255); SWEMWBS (228); SWN (300, 301); SWN-K (302); TooL (303); WEMWBS (304); WHOQOL-100 (305); WHOQOL-BREF (296); W-QOLIQOL (306, 307) |
| <b>Substance use disorder (including alcoholism disorder)</b>                | LQoL (308); OQ-45 (309); Q-LES-Q-SF (310); QoL-10 (311); QoL-5 (311); RGPS (164); SEQOL (312); SOS-10 (313); SQLP (255); TEAQV (314); WHOQOL-100 (315); PROMIS (316)                                                                                                                                                                                                                                                                                                                                                                                                                                                          |
| <b>Mental health not specified (Including serious mental health illness)</b> | CHU9D (317); CWS (318); EFQ (56); EQ-5D-3L (235); EUROHIS-QoL (319); FS (320); MHC-SF (240, 321); MHRM (322); Mini-SeRvE (227); MLQ (230); OxCAP-MH (323); PedsQL (324); PROMIS (325); PTQL (130); Q-LES-Q (326); Q-LES-Q-SF (327); QLQ-IR (328); QLQ-RSR (329); QoL-ME (148); QoL-P (330); QPR (331); ReQoL-10 {Keetharuth, 2020 #44040;Keetharuth, 2018 #44116}; ReQoL-20 {Keetharuth, 2020 #44040;Keetharuth, 2018 #44116}; RPRS (332); RSA-B (333); SEIQoL-DW (334); SeRvE (227); SF-12 (250, 294); SOS-10 (335); SPF-ILs/SPF-IL-58 (336); SWLS (337); WEMWBS (304); WHO-10 (338); WHOQOL-BREF (339, 340)                 |
| <b>Psychiatric Inpatients</b>                                                | FACIT-Sp-12 (341); SOS-10 (182); VSP-A (206)                                                                                                                                                                                                                                                                                                                                                                                                                                                                                                                                                                                  |
| <b>Other</b>                                                                 |                                                                                                                                                                                                                                                                                                                                                                                                                                                                                                                                                                                                                               |
| <b>Attention deficit hyperactivity disorder</b>                              | AQOL-MHS (232); CHIP-CE (342); CHIP-CE/PRF (343); SF-36 (344); TACQOL-CF (345); YQOL-R (220)                                                                                                                                                                                                                                                                                                                                                                                                                                                                                                                                  |
| <b>Autism spectrum disorder</b>                                              | FQoL (346); VSP-A (347)                                                                                                                                                                                                                                                                                                                                                                                                                                                                                                                                                                                                       |
| <b>Dementia</b>                                                              | CASP-19 (348); DHP (349)                                                                                                                                                                                                                                                                                                                                                                                                                                                                                                                                                                                                      |
| <b>Carers of children with mental and behavioural disorders</b>              | AC-QoL (350)                                                                                                                                                                                                                                                                                                                                                                                                                                                                                                                                                                                                                  |
| <b>Carers of people with mental health difficulties</b>                      | AC-QoL (351)                                                                                                                                                                                                                                                                                                                                                                                                                                                                                                                                                                                                                  |

## References

1. Sintonen H, Pekurinen M. A fifteen-dimensional measure of health-related quality of life (15D) and its applications. In: Walker SR, Rosser RM, editors. *Quality of life assessment: key issues in the 1990s*. Dordrecht: Kluwer Academic Publishers; 1993. p. 185-95.
2. Sintonen H. The 15D instrument of health-related quality of life: properties and applications. *Ann Med*. 2001;33(5):328-36.
3. Apajasalo M, Sintonen H, Holmberg C, Sinkkonen J, Aalberg V, Pihko H, et al. Quality of life in early adolescence: A sixteendimensional health-related measure (16D). *Qual Life Res*. 1996;5(2):205-11.
4. Apajasalo M, Rautonen J, Holmberg C, Sinkkonen J, Aalberg V, Pihko H, et al. Quality of life in pre-adolescence: a 17-dimensional health-related measure (17D). *Qual Life Res*. 1996;5(6):532-8.
5. Myers JE, Sweeney TJ. *The Five Factor Wel (WEL-J)*. 1999.
6. Myers JE, Luecht RM, Sweeney TJ. The factor structure of wellness: Reexamining theoretical and empirical models underlying the wellness evaluation of lifestyle (WEL) and the five-factor Wei. *Measurement and Evaluation in Counseling and Development*. 2004;36(4):194-208.
7. Myers JE, Sweeney TJ. *Five Factor Wellness Inventory: Adult, teenage, and elementary school versions*: Mind Garden, Incorporated; 2005.
8. Sacchetto B, Aguiar R, Vargas-Moniz MJ, Jorge-Monteiro MF, Neves MJ, Cruz MA, et al. The Capabilities Questionnaire for the Community Mental Health Context (CQ-CMH): A measure inspired by the capabilities approach and constructed through consumer-researcher collaboration. *Psychiatric Rehabilitation Journal*. 2016;39(1):55-61.
9. Joseph S, Becker S, Elwick H, Silburn R. Adult carers quality of life questionnaire (AC-QoL): development of an evidence-based tool. *Mental Health Review Journal*. 2012.
10. Beusterien KM, Yeung J-E, Pang F, Brazier J. Development of the multi-attribute adolescent health utility measure (AHUM). *Health and Quality of life outcomes*. 2012;10(1):102.
11. Richardson J, Hawthorne G, editors. *The Australian quality of life (AQoL) instrument: psychometric properties of the descriptive system and initial validation*. 19th Australian Conference of Health Economists; 1998.
12. Richardson JR, Peacock SJ, Hawthorne G, Iezzi A, Elsworth G, Day NA. Construction of the descriptive system for the assessment of quality of life AQoL-6D utility instrument. *Health and Quality of Life Outcomes*. 2012;10(1):38.
13. Misajon R, Hawthorne G, Richardson J, Barton J, Peacock S, Iezzi A, et al. Vision and quality of life: the development of a utility measure. *Invest Ophthalmol Vis Sci*. 2005;46(11):4007-15.
14. Richardson J, Iezzi A, Khan M, Sinha K, Mihalopoulos C, Herrman H, et al. Data used in the development of the AQoL-8D (PsyQoL) Quality of Life Instrument. *Research paper*. 2009;40.
15. Richardson J, Iezzi A, Khan MA, Maxwell A. Validity and reliability of the Assessment of Quality of Life (AQoL)-8D multi-attribute utility instrument. *Patient*. 2014;7(1):85-96.
16. Chavez L, Mir K, Canino G. Starting from scratch: the development of the adolescent quality of life-mental health scale (AQOL-MHS). *Culture, Medicine, and Psychiatry*. 2012;36(3):465-79.
17. Turnpenny A, Caiels J, Whelton B, Richardson L, Beadle-Brown J, Crowther T, et al. Developing an Easy Read Version of the Adult Social Care Outcomes Toolkit (ASCOT). *J Appl Res Intellect Disabil*. 2018;31(1):e36-e48.

18. Rand S, Caiels J, Collins G, Forder J. Developing a proxy version of the Adult social care outcome toolkit (ASCOT). *Health and Quality of Life Outcomes*. 2017;15(1):108.
19. Rand S, Malley J, Netten A. Measuring the Social Care Outcomes of Informal Carers, PSSRU Discussion Paper 2833. 2012.
20. Netten A, Burge P, Malley J, Potoglou D, Towers AM, Brazier J, et al. Outcomes of social care for adults: developing a preference-weighted measure. *Health Technol Assess*. 2012;16(16):1-166.
21. Manificat S, Dazord A. Evaluation de la qualité de vie de l'enfant : Validation d'un questionnaire, premiers résultats. *Neuropsychiatrie De L'enfance Et De L'adolescence*. 1997;45:106-14.
22. Kinderman P, Schwannauer M, Pontin E, Tai S. The development and validation of a general measure of well-being: the BBC well-being scale. *Quality of life research : an international journal of quality of life aspects of treatment, care and rehabilitation*. 2011;20(7):1035-42.
23. Priebe S, Gruyters T, Heinze M, Hoffmann C, Jäkel A. [Subjective evaluation criteria in psychiatric care--methods of assessment for research and general practice]. *Psychiatr Prax*. 1995;22(4):140-4.
24. Kaiser W, Isermann M, Hoffmann K, Huxley P, Priebe S. [Short assessment of subjective quality of life. Application and results of a short form of the Berliner Lebensqualitätprofil (BELP-KF)]. *Fortschr Neurol Psychiatr*. 1999;67(9):413-25.
25. Cantril H. Pattern of human concerns. New Brunswick: Rutgers University Press; 1965.
26. California Department of Mental Health. Adult performance outcome system: Clinical training manual (Chapter 6). 1999.
27. Carlson JA, Sarkin AJ, Levack AE, Sklar M, Tally SR, Gilmer TP, et al. Evaluating a measure of social health derived from two mental health recovery measures: The California Quality of Life (CA-QOL) and Mental Health Statistics Improvement Program Consumer Survey (MHSIP). *Community Ment Health J*. 2011;47(4):454-62.
28. Brouwer WB, van Exel NJ, van Gorp B, Redekop WK. The CarerQol instrument: a new instrument to measure care-related quality of life of informal caregivers for use in economic evaluations. *Qual Life Res*. 2006;15(6):1005-21.
29. Börsch-Supan A, Jürges H. The Survey of Health, Ageing and Retirement in Europe – Methodology. 2005.
30. Börsch-Supan A, Brandt M, Hunkler C, Kneip T, Korbmacher J, Malter F, et al. Data Resource Profile: the Survey of Health, Ageing and Retirement in Europe (SHARE). *Int J Epidemiol*. 2013;42(4):992-1001.
31. Hyde M, Wiggins RD, Higgs P, Blane DB. A measure of quality of life in early old age: the theory, development and properties of a needs satisfaction model (CASP-19). *Aging Ment Health*. 2003;7(3):186-94.
32. Hennessy CH, Moriarty DG, Zack MM, Scherr PA, Brackbill R. Measuring health-related quality of life for public health surveillance. *Public Health Rep*. 1994;109(5):665-72.
33. Starfield B, Bergner M, Ensminger M, Riley A, Ryan S, Green B, et al. Adolescent health status measurement: development of the Child Health and Illness Profile. *Pediatrics*. 1993;91(2):430-5.
34. Riley AW, Forrest CB, Rebok GW, Starfield B, Green BF, Robertson JA, et al. The Child Report Form of the CHIP-Child Edition: reliability and validity. *Med Care*. 2004;42(3):221-31.

35. Riley AW, Forrest CB, Starfield B, Rebok GW, Robertson JA, Green BF. The Parent Report Form of the CHIP-Child Edition: reliability and validity. *Med Care*. 2004;42(3):210-20.
36. Landgraf JM, van Grieken A, Raat H. Giving voice to the child perspective: psychometrics and relative precision findings for the Child Health Questionnaire self-report short form (CHQ-CF45). *Qual Life Res*. 2018;27(8):2165-76.
37. Landgraf JM, Abetz LN. Functional status and well-being of children representing three cultural groups: Initial self-reports using the chq-cf87. *Psychology & Health*. 1997;12(6):839-54.
38. Landgraf JM, Abetz L, Ware JE. *The Child Health Questionnaire (CHQ): A user's manual*. 1996.
39. Raat H, Botterweck AM, Landgraf JM, Hoogeveen WC, Essink-Bot M-L. Reliability and validity of the short form of the child health questionnaire for parents (CHQ-PF28) in large random school based and general population samples. *Journal of epidemiology and community health*. 2005;59(1):75-82.
40. Landgraf JM, Maunsell E, Speechley KN, Bullinger M, Campbell S, Abetz L, et al. Canadian-French, German and UK versions of the Child Health Questionnaire: methodology and preliminary item scaling results. *Qual Life Res*. 1998;7(5):433-45.
41. Kaplan S, Barlow S, Spetter D, Sullivan L, Khan A, Grand R. Assessing functional status and health-related quality of life among school-aged children: Reliability and validity of a new self-reported measure. *Qual Life Res*. 1995:444.
42. Saigal S, Rosenbaum P, Feeny D, Furlong W. *Multiattribute health status classification system for pre-school children: Final Report to The Medical Research Council of Canada for Grant No. MA 12956*. 2000.
43. Nathan PC, Furlong W, Horsman J, Van schaik C, Rolland M, Weitzman S, et al. Inter-observer agreement of a comprehensive health status classification system for pre-school children among patients with Wilms' tumor or advanced. *Qual Life Res*. 2004;13(10):1707-14.
44. Saigal S, Rosenbaum P, Stoskopf B, Hout L, Furlong W, Feeny D, et al. Development, reliability and validity of a new measure of overall health for pre-school children. *Qual Life Res*. 2005;14(1):243-52.
45. Stevens K. Developing a descriptive system for a new preference-based measure of health-related quality of life for children. *Qual Life Res*. 2009;18(8):1105-13.
46. Beattie PE, Lewis-Jones MS. A comparative study of impairment of quality of life in children with skin disease and children with other chronic childhood diseases. *Br J Dermatol*. 2006;155(1):145-51.
47. Gatt JM, Burton KL, Schofield PR, Bryant RA, Williams LM. The heritability of mental health and wellbeing defined using COMPAS-W, a new composite measure of wellbeing. *Psychiatry Res*. 2014;219(1):204-13.
48. Mulkern VM, Manderscheid RW. Characteristics of community support program clients in 1980 and 1984. *Hosp Community Psychiatry*. 1989;40(2):165-72.
49. Graham P, Stevenson J, Flynn D. A new measure of health-related quality of life for children: Preliminary findings. *Psychology & Health*. 1997;12(5):655-65.
50. Krabbe PFM, van Asselt ADI, Selivanova A, Jabrayilov R, Vermeulen KM. Patient-Centered Item Selection for a New Preference-Based Generic Health Status Instrument: CS-Base. *Value Health*. 2019;22(4):467-73.
51. Quirk A, Smith S, Hamilton S, Lamping D, Lelliott P, Stahl D, et al. Development of the carer well-being and support (CWS) questionnaire. *Mental Health Review Journal*. 2012;17(3):128-38.

52. Parkerson GR, Jr., Broadhead WE, Tse CK. The Duke Health Profile. A 17-item measure of health and dysfunction. *Med Care*. 1990;28(11):1056-72.
53. Vo TXH, Guillemin F, Deschamps J-P. Psychometric Properties of the DUKE Health Profile-adolescent Version (DHP-A): A Generic Instrument for Adolescents. *Qual Life Res*. 2005;14(10):2229-34.
54. Chaplin JE, Koopman HM, Schmidt S. DISABKIDS smiley questionnaire: the TAKE 6 assisted health-related quality of life measure for 4 to 7-year-olds. *Clin Psychol Psychother*. 2008;15(3):173-80.
55. Petersen C, Schmidt S, Power M, Bullinger M. Development and pilot-testing of a health-related quality of life chronic generic module for children and adolescents with chronic health conditions: A European perspective. *Qual Life Res*. 2005;14(4):1065-77.
56. Uher R, Goodman R. The Everyday Feeling Questionnaire: the structure and validation of a measure of general psychological well-being and distress. *Soc Psychiatry Psychiatr Epidemiol*. 2010;45(3):413-23.
57. Eiser C, Vance YH, Seamark D. The development of a theoretically driven generic measure of quality of life for children aged 6-12 years: a preliminary report. *Child Care Health Dev*. 2000;26(6):445-56.
58. The EuroQol Group. EuroQol-a new facility for the measurement of health-related quality of life. *Health policy*. 1990;16(3):199-208.
59. Herdman M, Gudex C, Lloyd A, Janssen M, Kind P, Parkin D, et al. Development and preliminary testing of the new five-level version of EQ-5D (EQ-5D-5L). *Qual Life Res*. 2011;20(10):1727-36.
60. Wille N, Badia X, Bonsel G, Burström K, Cavrini G, Devlin N, et al. Development of the EQ-5D-Y: a child-friendly version of the EQ-5D. *Qual Life Res*. 2010;19(6):875-86.
61. Schmidt S, Mühlhan H, Power M. The EUROHIS-QOL 8-item index: psychometric results of a cross-cultural field study. *Eur J Public Health*. 2006;16(4):420-8.
62. Webster K, Odom L, Peterman A, Lent L, Cella D. The Functional Assessment of Chronic Illness Therapy (FACIT) measurement system: Validation of version 4 of the core questionnaire. *Qual Life Res*. 1999:604-.
63. Huber D, Henrich G, Herschbach P. Measuring the quality of life: a comparison between physically and mentally chronically ill patients and healthy persons. *Pharmacopsychiatry*. 1988;21(6):453-5.
64. McCubbin H, Patterson J. Family member well-being index (FMWB). In: McCubbin HI, Thompson AI, McCubbin MA, editors. *Family Assessment: Resiliency, Coping and Adaptation—Inventories for Research and Practice*. Madison, WI: University of Wisconsin System; 1996. p. 753-82.
65. Park J, Hoffman L, Marquis J, Turnbull AP, Poston D, Mannan H, et al. Toward assessing family outcomes of service delivery: validation of a family quality of life survey. *J Intellect Disabil Res*. 2003;47(Pt 4-5):367-84.
66. Diener E, Wirtz D, Tov W, Kim-Prieto C, Choi D-w, Oishi S, et al. New Well-being Measures: Short Scales to Assess Flourishing and Positive and Negative Feelings. *Social Indicators Research*. 2010;97(2):143-56.
67. Collier J, MacKinlay D, Phillips D. Norm values for the Generic Children's Quality of Life Measure (GCQ) from a large school-based sample. *Qual Life Res*. 2000;9(6):617-23.
68. Collier J, MacKinley D. Developing a generic child quality of life measure. *Health Psychology Update*. 1997;28:12-6.



69. Hyland ME, Sodergren SC. Development of a new type of global quality of life scale, and comparison of performance and preference for 12 global scales. *Qual Life Res.* 1996;5(5):469-80.
70. Garner BR, Scott CK, Dennis ML, Funk RR. The relationship between recovery and health-related quality of life. *J Subst Abuse Treat.* 2014;47(4):293-8.
71. Fazio AF. A concurrent validation study of the NCHS General Well-Being Schedule. *Vital Health Stat 2.* 1977(73):1-53.
72. Schulte M, Kümmell H. Entwicklung eines Fragebogens zur Lebensqualität auf der Grundlage des anthroposophischen Menschenbildes. *Der Merkurstab.* 1996;49:109-22.
73. Schulte M, Heckmann C, Kümmell H. Der Herdecker Fragebogen zur Lebensqualität (HLQ): Entwicklung, Ergebnisse, Verwendungsmöglichkeiten. In: Heusser PB, editor. *Akademische Forschung in der Anthroposophischen Medizin*: Peter Lang Verlag; 2000. p. 249-53.
74. Torrance GW, Boyle MH, Horwood SP. Application of multi-attribute utility theory to measure social preferences for health states. *Oper Res.* 1982;30(6):1043-69.
75. Torrance GW, Feeny DH, Furlong WJ, Barr RD, Zhang Y, Wang Q. Multiattribute utility function for a comprehensive health status classification system. *Health Utilities Index Mark 2.* *Med Care.* 1996;34(7):702-22.
76. Feeny D, Furlong W, Torrance GW, Goldsmith CH, Zhu Z, DePauw S, et al. Multiattribute and single-attribute utility functions for the health utilities index mark 3 system. *Med Care.* 2002;40(2):113-28.
77. Al-Janabi H, Flynn TN, Coast J. Development of a self-report measure of capability wellbeing for adults: the ICECAP-A. *Qual Life Res.* 2012;21(1):167-76.
78. Grewal I, Lewis J, Flynn T, Brown J, Bond J, Coast J. Developing attributes for a generic quality of life measure for older people: preferences or capabilities? *Soc Sci Med.* 2006;62(8):1891-901.
79. Mattejat F, Jungmann J, Meusers M, Moik C, Nölkel P, Schaff C, et al. [An inventory for assessing the quality of life of children and adolescents--a pilot study]. *Z Kinder Jugendpsychiatr Psychother.* 1998;26(3):174-82.
80. Jabrayilov R, van Asselt ADI, Vermeulen KM, Volger S, Detzel P, Dainelli L, et al. A descriptive system for the Infant health-related Quality of life Instrument (IQI): Measuring health with a mobile app. *PLoS ONE.* 2018;13(8):e0203276.
81. Landgraf JM. *The Infant/Toddler Child Health Questionnaire: Conceptual Framework, Logic Content, and Preliminary Psychometric Results.* 1994.
82. Raat H, Landgraf JM, Oostenbrink R, Moll HA, Essink-Bot ML. Reliability and validity of the Infant and Toddler Quality of Life Questionnaire (ITQOL) in a general population and respiratory disease sample. *Qual Life Res.* 2007;16(3):445-60.
83. Landgraf JM, Vogel I, Oostenbrink R, van Baar ME, Raat H. Parent-reported health outcomes in infants/toddlers: measurement properties and clinical validity of the ITQOL-SF47. *Qual Life Res.* 2013;22(3):635-46.
84. Ravens-Sieberer U, Gosch A, Rajmil L, Erhart M, Bruil J, Duer W, et al. KIDSCREEN-52 quality-of-life measure for children and adolescents. *Expert Rev Pharmacoecon Outcomes Res.* 2005;5(3):353-64.
85. Ravens-Sieberer U, Bullinger M. *KINDL-R Questionnaire for Measuring Health-Related Quality of Life in Children and Adolescents. Revised version. Manual.* 2000.

86. De Leo D, Diekstra RF, Lonqvist J, Trabucchi M, Cleiren MH, Frisoni GB, et al. LEIPAD, an internationally applicable instrument to assess quality of life in the elderly. *Behav Med*. 1998;24(1):17-27.
87. Fugl-Meyer AR, Bränholm I-B, Fugl-Meyer KS. Happiness and domain-specific life satisfaction in adult northern Swedes. *Clin Rehabil*. 1991;5(1):25-33.
88. Lancon C, Auquier P, Toumi M, Launois R, Llorca P, Lehman A, et al. Validation of the brief Quality of Life Interview (QoLI): I. Internal structure. 2000.
89. Lehman AF, Ward NC, Linn LS. Chronic mental patients: the quality of life issue. *Am J Psychiatry*. 1982;139(10):1271-6.
90. Oliver N, Huxley P, Bridges K, Mohamad H. Quality of life and mental health services. 1996.
91. Lehman AF. Quality of Life Interview: Self-Administered Short Form (TL-30S Version). 1996.
92. Andrews FM, Withey SB. Social indicators of well-being: American perceptions of life quality. 1976.
93. Allardt E. About dimension of welfare: an explanatory analysis of the comparative Scandinavian survey. 1973.
94. Priebe S, Huxley P, Knight S, Evans S. Application and results of the Manchester Short Assessment of Quality of Life (MANSA). *Int J Soc Psychiatry*. 1999;45(1):7-12.
95. Mezzich JE, Cohen NL, Ruiperez MA, Banzato CE, Zapata-Vega MI. The Multicultural Quality of Life Index: presentation and validation. *J Eval Clin Pract*. 2011;17(2):357-64.
96. Keyes C. The Subjective Well-Being of America's Youth: Toward a Comprehensive Assessment. *Adolesc Fam Health* 2005;4:3-11.
97. Chambers LW, Sackett DL, Goldsmith CH, Macpherson AS, McAuley RG. Development and application of an index of social function. *Health services research*. 1976;11(4):430-41.
98. Young S, Bullock W. Illness management and recovery, and the role of the Mental Health Recovery Measure in Outcomes Research. 2003.
99. W.A. B, S.L. Y. The Mental Health Recovery Measure (MHRM). 111th annual meeting of the American Psychological Association Meeting; Toronto, Canada 2003.
100. Armstrong NP, Cohen AN, Helleman G, Reist C, Young AS. Validating a brief version of the mental health recovery measure for individuals with schizophrenia. *Psychiatr Serv*. 2014;65(9):1154-9.
101. Barber JMP, H.; Wilson, C. A.; Cook, C. C. H. Measuring mental health in the clinical setting: what is important to service users? The Mini-Service user Recovery Evaluation scale (Mini-SeRvE). *J Ment Health*. 2017;26(6):530-7.
102. Heinisch M, Ludwig M, Bullinger M. Psychometrische Testung der "Münchener Lebensqualitäts Liste (MLDL). In: M. Bullinger ML, N. von Steinbüchel, editor. *Lebensqualität bei kardiovaskulären Erkrankungen*. Göttingen, Toronto, Zürich: Hogrefe 1991. p. 73-90.
103. Steger MF, Frazier P, Kaler M, Oishi S. The meaning in life questionnaire: Assessing the presence of and search for meaning in life. *J Couns Psychol*. 2006;53(1):80-93.
104. Kobau R, Sniezek J, Zack MM, Lucas RE, Burns A. Well-being assessment: An evaluation of well-being scales for public health and population estimates of well-being among US adults. *Applied Psychology: Health and Well-Being*. 2010;2(3):272-97.
105. Vella-Brodrick DA, Allen FC. Development and psychometric validation of the Mental, Physical, and Spiritual Well-Being Scale. *Psychol Rep*. 1995;77(2):659-74.

106. Pukrop R, Möller H-J, Steinmeyer EM. Quality of life in psychiatry: a systematic contribution to construct validation and the development of the integrative assessment tool "modular system for quality of life". *European Archives of Psychiatry and Clinical Neuroscience*. 2000;250(3):120-32.
107. Hendriks RJ, Drewes HW, Spreeuwenberg MD, Ruwaard D, Huuksloot M, Zijderfeld C, et al. Measuring population health from a broader perspective: Assessing the My Quality of Life Questionnaire. *International journal of integrated care*. 2019;19(2).
108. Hunt SM, McKenna SP, McEwen J, Williams J, Papp E. The Nottingham Health Profile: subjective health status and medical consultations. *Soc Sci Med A*. 1981;15(3 Pt 1):221-9.
109. Hills P, Argyle M. The Oxford Happiness Questionnaire: a compact scale for the measurement of psychological well-being. *Personality and Individual Differences*. 2002;33(7):1073-82.
110. Bowling A. The Psychometric Properties of the Older People's Quality of Life Questionnaire, Compared with the CASP-19 and the WHOQOL-OLD. *Current Gerontology and Geriatrics Research*. 2009;2009:298950.
111. Bowling A, Hankins M, Windle G, Bilotta C, Grant R. A short measure of quality of life in older age: the performance of the brief Older People's Quality of Life questionnaire (OPQOL-brief). *Arch Gerontol Geriatr*. 2013;56(1):181-7.
112. Lambert MJ, Hansen NB, Umpriss V, Lunnen K, Okiishi J, Burlingame GM. Administration and scoring manual for the OQ-45.2. 1996.
113. Simon J, Anand P, Gray A, Rugkåsa J, Yeeles K, Burns T. Operationalising the capability approach for outcome measurement in mental health research. *Social Science and Medicine*. 2013;98:187-96.
114. Varni JW, Seid M, Rode CA. The PedsQL: measurement model for the pediatric quality of life inventory. *Med Care*. 1999;37(2):126-39.
115. Chan KS, Mangione-Smith R, Burwinkle TM, Rosen M, Varni JW. The PedsQL: reliability and validity of the short-form generic core scales and Asthma Module. *Med Care*. 2005;43(3):256-65.
116. Varni JW, Sherman SA, Burwinkle TM, Dickinson PE, Dixon P. The PedsQL Family Impact Module: preliminary reliability and validity. *Health and quality of life outcomes*. 2004;2:55-.
117. Varni JW, Seid M, Kurtin PS. Pediatric health-related quality of life measurement technology: A guide for health care decision makes. *Journal of Clinical Outcomes Management*. 1999;6:33-40.
118. Sherman SA, Eisen S, Burwinkle TM, Varni JW. The PedsQL Present Functioning Visual Analogue Scales: preliminary reliability and validity. *Health and quality of life outcomes*. 2006;4:75-.
119. Ruta DA, Garratt AM, Leng M, Russell IT, MacDonald LM. A new approach to the measurement of quality of life. The Patient-Generated Index. *Med Care*. 1994;32(11):1109-26.
120. Dupuy H. The psychological general well-being (PGWB) index. In: N. Wenger MM, C. Furburg, & J. Elinson, editor. *Assessment of quality of life in clinical trials of cardiovascular therapies* New York: Le Jacq Publishing; 1984. p. 170–83.
121. Hervás G, Vázquez C. Construction and validation of a measure of integrative well-being in seven languages: The Pemberton Happiness Index. *Health and Quality of Life Outcomes*. 2013;11(1):66.
122. Bann CM, Kobau R, Lewis MA, Zack MM, Luncheon C, Thompson WW. Development and psychometric evaluation of the public health surveillance well-being scale. *Qual Life Res*. 2012;21(6):1031-43.

123. Vaingankar JA, Subramaniam M, Chong SA, Abdin E, Orlando Edelen M, Picco L, et al. The positive mental health instrument: development and validation of a culturally relevant scale in a multi-ethnic Asian population. *Health and quality of life outcomes*. 2011;9:92-.
124. Vaingankar JA, Subramaniam M, Abdin E, Picco L, Chua BY, Eng GK, et al. Development, validity and reliability of the short multidimensional positive mental health instrument. *Qual Life Res*. 2014;23(5):1459-77.
125. Supranowicz P, Paż M. Holistic measurement of well-being: psychometric properties of the physical, mental and social well-being scale (PMSW-21) for adults. *Rocz Panstw Zakl Hig*. 2014;65(3):251-8.
126. Endicott J, Nee J, Yang R, Wohlberg C. Pediatric quality of life enjoyment and satisfaction questionnaire (PQ-LES-Q): reliability and validity. *J Am Acad Child Adolesc Psychiatry*. 2006;45(4):401-7.
127. Patrick DL, Danis M, Southerland LI, Hong G. Quality of life following intensive care. *J Gen Intern Med*. 1988;3(3):218-23.
128. Barbic S, Kidd SA, McKenzie K. Development and testing of the personal recovery outcome measure (Under review).
129. Cella D, Riley W, Stone A, Rothrock N, Reeve B, Yount S, et al. The Patient-Reported Outcomes Measurement Information System (PROMIS) developed and tested its first wave of adult self-reported health outcome item banks: 2005-2008. *J Clin Epidemiol*. 2010;63(11):1179-94.
130. Phattharayuttawat S, Ngamthipwatthana T, Pitiyawanun B. The development of the Pictorial Thai Quality of Life. *J Med Assoc Thai*. 2005;88(11):1605-18.
131. Ryff CD, Keyes CL. The structure of psychological well-being revisited. *J Pers Soc Psychol*. 1995;69(4):719-27.
132. Cummins RA, Lau ALD. An introduction to the International Wellbeing Group and the International Wellbeing Index. Fifth Conference of the International Society for Quality-of-Life Studies; Frankfurt, Germany 2003.
133. Cummins RA, Lau LD. Personal Wellbeing Index – School Children (PWI-SC) (English) 3rd Edition. 2005.
134. Waterman A, Schwartz S, Zamboanga BL, Ravert R, Williams M, Agocha VB, et al. The Questionnaire for Eudaimonic Well-Being: Psychometric properties, demographic comparisons, and evidence of validity. *The Journal of Positive Psychology*. 2010;5:41 - 61.
135. Endicott J, Nee J, Harrison W, Blumenthal R. Quality of Life Enjoyment and Satisfaction Questionnaire: a new measure. *Psychopharmacology bulletin*. 1993.
136. Ritsner M, Kurs R, Gibel A, Ratner Y, Endicott J. Validity of an abbreviated quality of life enjoyment and satisfaction questionnaire (Q-LES-Q-18) for schizophrenia, schizoaffective, and mood disorder patients. *Qual Life Res*. 2005;14(7):1693-703.
137. Ferrans CE, Powers MJ. Quality of life index: development and psychometric properties. *ANS Adv Nurs Sci*. 1985;8(1):15-24.
138. Rannestad T, Rustøen T. Ferrans and Powers Quality of Life Index. In: Michalos AC, editor. *Encyclopedia of Quality of Life and Well-Being Research*. Dordrecht: Springer Netherlands; 2014. p. 2259-63.
139. Bigelow DA, Gareau MJ, Young DJ. A quality of life interview for chronically disabled people. *Psychosocial Rehabilitation Journal*. 1990;14:94-8.

140. Bigelow DA, Brodsky G, Stewart L, Olson M. 14 - THE CONCEPT AND MEASUREMENT OF QUALITY OF LIFE AS A DEPENDENT VARIABLE IN EVALUATION OF MENTAL HEALTH SERVICES. In: Stahler GJ, Tash WR, editors. *Innovative Approaches to Mental Health Evaluation*: Academic Press; 1982. p. 345-66.
141. Skantze K. Defining subjective quality of life goals in schizophrenia: The Quality of Life Self-Assessment Inventory, QLS-100, a new approach to successful alliance and service development. Gothenburg, Sweden 1993.
142. Skantze K, Malm U, Dencker SJ, May PR, Corrigan P. Comparison of quality of life with standard of living in schizophrenic out-patients. *The British Journal of Psychiatry*. 1992;161(6):797-801.
143. Duquette RL, Dupuis G, Perrault J. A new approach for quality of life assessment in cardiac patients: rationale and validation of the Quality of Life Systemic Inventory. *Can J Cardiol*. 1994;10(1):106-12.
144. Ventegodt S, MMedSci E-M-C, Andersen NJ, Merrick J, editors. QOL 10 for clinical quality-assurance and research in treatment-efficacy : Ten key questions for measuring the global quality of life , self-rated physical and mental health , and self-rated social-, sexual-and working ability 2010.
145. Lindholt JS, Ventegodt S, Henneberg EW. Development and validation of QoL5 for clinical databases. A short, global and generic questionnaire based on an integrated theory of the quality of life. *Eur J Surg*. 2002;168(2):107-13.
146. Frisch MB, Cornell J, Villanueva M, Retzlaff PJ. Clinical Validation of the Quality of Life Inventory: A Measure of Life Satisfaction for Use in Treatment Planning and Outcome Assessment. *Psychol Assess*. 1992;4(1):92-101.
147. Yu YWY, Cheng HL, Long FW, Chen MJ, Lin CH. The development of quality of life scale for patients with mental disorders. *Public Health Quarterly*. 1995;2(1):29-40.
148. Buitenweg DC, Bongers IL, van de Mheen D, van Oers HA, van Nieuwenhuizen C. Cocreative Development of the QoL-ME: A Visual and Personalized Quality of Life Assessment App for People With Severe Mental Health Problems. *JMIR Ment Health*. 2019;6(3):e12378.
149. Raphael D, Waalen J, Karabanow A. Factor Analytic Properties of the Quality of Life Profile: Examination of the Nine Subdomain Quality of Life Model. *Psychol Rep*. 2001;88(1):265-76.
150. Placentino A, Sebastiani G, Spagnolo A, Rossi G, Rucci P, Starace F, et al. Quality of life-proxy (QoL-P). *Epidemiologia e Psichiatria Sociale*. 2002;11(4):287-90.
151. Raphael D, Rukholm E, Brown I, Hill-Bailey P, Donato E. The Quality of Life Profile--Adolescent Version: background, description, and initial validation. *J Adolesc Health*. 1996;19(5):366-75.
152. Burckhardt CS, Woods SL, Schultz AA, Ziebarth DM. Quality of life of adults with chronic illness: a psychometric study. *Res Nurs Health*. 1989;12(6):347-54.
153. Neil ST, Kilbride M, Pittb L, Nothard S, Welford M, Sellwood W, et al. The questionnaire about the process of recovery (QPR): A measurement tool developed in collaboration with service users. *Psychosis: Psychological, Social and Integrative Approaches*. 2009;1(2):145-55.
154. Manificat S, Dazord A, Langue J, Danjou G, Bauche P, Bovet F, et al. [Evaluation of the quality of life of infants and very young children: validation of a questionnaire. Multicenter European study]. *Arch Pediatr*. 2000;7(6):605-14.
155. Fanshel S, Bush JW. A Health-Status Index and its Application to Health-Services Outcomes. *Operations Research*. 1970;18(6):1021-66.

156. Kaplan RM, Sieber WJ, Ganiats TG. The quality of well-being scale: Comparison of the interviewer-administered version with a self-administered questionnaire. *Psychology & Health*. 1997;12(6):783-91.
157. Corrigan PW, Giffort D, Rashid F, Leary M, Okeke I. Recovery as a Psychological Construct. *Community Ment Health J*. 1999;35(3):231-9.
158. Giffort D, Schmook A, Woody C, Vollendorf C, Gervain M. Construction of a scale to measure consumer recovery. 1995.
159. Corrigan PW, Salzer M, Ralph RO, Sangster Y, Keck L. Examining the factor structure of the recovery assessment scale. *Schizophr Bull*. 2004;30(4):1035-41.
160. Keetharuth AD, Brazier J, Connell J, Bjorner JB, Carlton J, Buck ET, et al. Recovering Quality of Life (ReQoL): a new generic self-reported outcome measure for use with people experiencing mental health difficulties. *The British Journal of Psychiatry*. 2018;212(1):42-9.
161. Keetharuth AB, J.; Connell, J.; Ricketts, T.; Carlton, J.; Taylor-Buck, L.; Barkham, M. Development of a new patient reported outcome measure (PROM) in mental health: Recovering Quality of Life (ReQoL). *Journal of Mental Health Policy and Economics*. 2016;19:S5.
162. Keetharuth A, Brazier J, Connell J, Ricketts T, Carlton J, Taylor-Buck L, et al. Development of a new patient reported outcome measure (PROM) in mental health: Recovering Quality of Life (ReQoL). *Journal of Mental Health Policy and Economics*. 2016;19:S5.
163. John M, Jeffries FW, Acuna-Rivera M, Warren F, Simonds LM. Development of measures to assess personal recovery in young people treated in specialist mental health services. *Clinical Psychology & Psychotherapy*. 2015;22(6):513-24.
164. Groshkova T, Best D, White W. Recovery Group Participation Scale (RGPS): Factor structure in alcohol and heroin recovery populations. *Journal of Groups in Addiction & Recovery*. 2011;6(1-2):76-92.
165. Russinova Z, Rogers ES, Ellison ML. Recovery Promoting Relationships Scale manual. 2006.
166. O'Connell M, Tondora J, Croog G, Evans A, Davidson L. From rhetoric to routine: assessing perceptions of recovery-oriented practices in a state mental health and addiction system. *Psychiatr Rehabil J*. 2005;28(4):378-86.
167. Barbic SP, Kidd SA, Davidson L, McKenzie K, O'Connell MJ. Validation of the brief version of the Recovery Self-Assessment (RSA-B) using Rasch measurement theory. *Psychiatric Rehabilitation Journal*. 2015;38(4):349-58.
168. Drayton M, Birchwood M, Trower P. Early attachment experience and recovery from psychosis. *Br J Clin Psychol*. 1998;37(3):269-84.
169. McGee HM, O'Boyle CA, Hickey A, O'Malley K, Joyce CR. Assessing the quality of life of the individual: the SEIQoL with a healthy and a gastroenterology unit population. *Psychol Med*. 1991;21(3):749-59.
170. O'Boyle CA, Browne J, Hickey A, McGee HM, Joyce CRB. Schedule for the Evaluation of Individual Quality of Life (SEIQoL): A Direct Weighting procedure for Quality of Life Domains (SEIQoL-DW). Administration Manual. 1993.
171. Becker G, Merk CS, Meffert C, Momm F. Measuring individual quality of life in patients receiving radiation therapy: the SEIQoL-Questionnaire. *Qual Life Res*. 2014;23(7):2025-30.
172. Ventegodt S, Merrick J, Andersen NJ. Measurement of quality of life III. From the IQOL theory to the global, generic SEQOL questionnaire. *ScientificWorldJournal*. 2003;3:972-91.

173. Barber JM, Parkes M, Parsons H, Cook CC. Importance of spiritual well-being in assessment of recovery: The Service-user Recovery Evaluation (SeRvE) scale. *The Psychiatrist*. 2012;36(12):444-50.
174. Ware J, Jr., Kosinski M, Keller SD. A 12-Item Short-Form Health Survey: construction of scales and preliminary tests of reliability and validity. *Med Care*. 1996;34(3):220-33.
175. Ware JE, Sherbourne CD, Davies AR. Developing and Testing the MOS 20-Item Short-Form Health Survey. A General Population Application. In: Anita L. Stewart and John E. Ware J, editor. *Measuring Functioning and Well-Being: The Medical Outcomes Study Approach*. N.C: Duke University Press; 1992. p. 277-90.
176. Hays RD, Sherbourne CD, Mazel RM. The RAND 36-Item Health Survey 1.0. *Health Econ*. 1993;2(3):217-27.
177. Brazier J, Roberts J, Deverill M. The estimation of a preference-based measure of health from the SF-36. *J Health Econ*. 2002;21(2):271-92.
178. Ware J, Kosinski M, Dewey J, Gandek B. How to score and interpret single-item health status measures: A manual for users of the SF-8 health survey. Lincoln, RI: QualityMetric Incorporated. 2001;15(10):5.
179. Lyubomirsky S, Lepper HS. A Measure of Subjective Happiness: Preliminary Reliability and Construct Validation. *Social Indicators Research*. 1999;46(2):137-55.
180. Daaleman TP, Frey BB. The Spirituality Index of Well-Being: a new instrument for health-related quality-of-life research. *Annals of family medicine*. 2004;2(5):499-503.
181. Baker F, Intagliata J. Quality of life in the evaluation of community support systems. *Eval Program Plann*. 1982;5(1):69-79.
182. Blais M, Blagys MD, Rivas-Vazquez R, Bello I, Sinclair SJ. Development and Initial Validation of a Brief Symptom Measure. *Clin Psychol Psychother*. 2015;22(3):267-75; quiz 76-7.
183. Nieboer A, Lindenberg S, Boomsma A, Bruggen ACV. Dimensions Of Well-Being And Their Measurement: The Spf-II Scale. *Social Indicators Research*. 2005;73(3):313-53.
184. Spitzer WO, Dobson AJ, Hall J, Chesterman E, Levi J, Shepherd R, et al. Measuring the quality of life of cancer patients: a concise QL-index for use by physicians. *J Chronic Dis*. 1981;34(12):585-97.
185. Gerin P, Dazord A, Boissel J, Chifflet R. Quality of life assessment in therapeutic trials: rationale for and presentation of a more appropriate instrument. *Fundamental & Clinical Pharmacology*. 1992;6(6):263-76.
186. Dazord A, Gerin P, Boissel JP. Subjective Quality of Life Assessment in Therapeutic Trials: Presentation of a New Instrument in France (SQLP: Subjective Quality of Life Profile) and First Results. In: Orley J. KW, editor. *Quality of Life Assessment: International Perspectives*. Berlin, Heidelberg: Springer; 1994.
187. Gomez R, Fischer JW. Domains of spiritual well-being and development and validation of the Spiritual Well-Being Questionnaire. *Personality and Individual Differences*. 2003;35:1975-91.
188. Paloutzian RF, Ellison CW. Loneliness, Spiritual Well-Being and the Quality of Life. In: L. A. Peplau DP, editor. *Loneliness: A Sourcebook of Current Theory, Research and Therapy*. New York: John Wiley & Sons; 1982. p. 224-36.
189. Paloutzian RFB, Rodger K.; Wildman, Ashley J. Spiritual Well-Being Scale: Mental and physical health relationships. Cobb, Mark [Ed], ORCID: 0000-0002-6955-4664; Puchalski, Christina M [Ed]; Rumbold, Bruce [Ed] (2012) *Oxford textbook of spirituality in healthcare* (pp 353-358) xvi, 501 pp New York, NY, US: Oxford University Press; US. 2012:353-8.

190. Stewart-Brown ST, A.; Tennant, R.; Platt, S.; Parkinson, J.; Weich, S. Internal construct validity of the Warwick-Edinburgh Mental Well-Being Scale (WEMWBS): A Rasch analysis using data from the Scottish Health Education Population Survey. *Health and Quality of Life Outcomes*. 2009;7.
191. Diener E, Emmons RA, Larsen RJ, Griffin S. The Satisfaction With Life Scale. *J Pers Assess*. 1985;49(1):71-5.
192. Naber D. A self-rating to measure subjective effects of neuroleptic drugs, relationships to objective psychopathology, quality of life, compliance and other clinical variables. *Int Clin Psychopharmacol*. 1995;10 Suppl 3:133-8.
193. Naber D, Moritz S, Lambert M, Pajonk FG, Holzbach R, Mass R, et al. Improvement of schizophrenic patients' subjective well-being under atypical antipsychotic drugs. *Schizophr Res*. 2001;50(1-2):79-88.
194. Keyes CLM. Social well-being. *Soc Psychol Q*. 1998;61:121-40.
195. Bruil J, Fekkes M, Vogels T, Verrips E. The validity and reliability of the TAAQOL: A health-related quality of life instrument comprising health status weighted by the impact of health problems on well being. *Qual Life Res*. 2001;10:257.
196. Fekkes M, Kamphuis RP, Ottenkamp J, Verrips E, Vogels T, Kamphuis M, et al. Health-related quality of life in young adults with minor congenital heart disease. *Psychology & Health*. 2001;16(2):239-50.
197. Verrips GH, Vogels AGC, Verloove-Vanhorick SP, Fekkes M, Koopman HM, Kamphuis RP, et al. Health-related quality of life measure for children - the TACQOL. *Journal of Applied Therapeutics*. 1997;1:357-60.
198. Vogels AGC, Verrips GH, Fekkes M, Kamphuis RP, Koopman HT, heunissen NCM. Young children's health related quality of life: development of the TACQOL. *Qual Life Res*. 1998;7:457-65.
199. Theunissen NC, Vogels TG, Koopman HM, Verrips GH, Zwinderman KA, Verloove-Vanhorick SP, et al. The proxy problem: child report versus parent report in health-related quality of life research. *Qual Life Res*. 1998;7(5):387-97.
200. Grabot D, Martin C, Auriacombe M, Tignol J. [Assisted evaluation scale of quality of life]. *Encephale*. 1996;22(3):181-5.
201. Lawford J, Volavka N, Eiser C. A generic measure of Quality of Life for children aged 3-8 years: results of two preliminary studies. *Pediatr Rehabil*. 2001;4(4):197-207.
202. Evans DR, Burns JE, Robinson WE, Garrett OJ. The quality of life questionnaire: A multidimensional measure. *Am J Community Psychol*. 1985;13(3):305-22.
203. Lindström E, Jönsson L, Berntsson A. PMH56 A patient perspective on side effects of antipsychotic therapy: the TOOL instrument. *Value Health*. 2009;12(7):A361.
204. Fuh JL, Wang SJ, Lu SR, Juang KD. Assessing quality of life for adolescents in Taiwan. *Psychiatry Clin Neurosci*. 2005;59(1):11-8.
205. Simeoni MC, Auquier P, Antoniotti S, Sapin C, San Marco JL. Validation of a French health-related quality of life instrument for adolescents: the VSP-A. *Qual Life Res*. 2000;9(4):393-403.
206. Sapin C, Simeoni MC, El Khammar M, Antoniotti S, Auquier P. Reliability and validity of the VSP-A, a health-related quality of life instrument for ill and healthy adolescents. *J Adolesc Health*. 2005;36(4):327-36.
207. Sapin C, Antoniotti S, Simeoni MC, Clément A, El Khammar M, Auquier P. Shortening the VSP-A: Preliminary development of the VSP-A12, a 12-item short-form. *Qual Life Res*. 2004;13(1):235-41.



208. Tennant R, Hiller L, Fishwick R, Platt S, Joseph S, Weich S, et al. The Warwick-Edinburgh Mental Well-being Scale (WEMWBS): development and UK validation. *Health and Quality of Life Outcomes*. 2007;5(1):63.
209. Bech P, Gudex C, Johansen KS. The WHO (Ten) Well-Being Index: validation in diabetes. *Psychother Psychosom*. 1996;65(4):183-90.
210. World Health Organization. Well-being Measures in Primary Health Care/The Depcare Project. Copenhagen; 1998.
211. Bech P. Measuring the dimension of Psychological General Well-Being by the WHO-5 119. *Quality of Life Newsletter*. 2004;32:15-6.
212. The WHOQOL Group. The development of the World Health Organisation Quality of Life assessment instrument (the WHOQOL). In: Orley J, Kuyken W, editors. *Quality of life assessment: international perspectives*. Berlin, Germany: Springer-Verlag; 1994. p. 41-60.
213. Skevington SM, Lotfy M, O'Connell KA. The World Health Organization's WHOQOL-BREF quality of life assessment: psychometric properties and results of the international field trial. A report from the WHOQOL group. *Qual Life Res*. 2004;13(2):299-310.
214. Power M, Quinn K, Schmidt S, Group W-O. Development of the WHOQOL-Old Module. *Qual Life Res*. 2005;14(10):2197-214.
215. Gueldner SH, Michel Y, Bramlett MH, Liu C-F, Johnston LW, Endo E, et al. The Well-Being Picture Scale: A Revision of the Index of Field Energy. *Nursing Science Quarterly*. 2004;18(1):42-50.
216. Terwilliger SHG, Sarah H.; Bronstein, Laura. A Preliminary Evaluation of the Well-Being Picture Scale-Children's Version (WPS-CV) in a Sample of Fourth and Fifth Graders. *Nursing Science Quarterly*. 2012;25(2):160-6.
217. Diamond R, Becker M. The Wisconsin Quality of Life Index: a multidimensional model for measuring quality of life. *J Clin Psychiatry*. 1999;60 Suppl 3:29-31.
218. Becker M, Diamond R, Sainfort F. A new patient focused index for measuring quality of life in persons with severe and persistent mental illness. *Qual Life Res*. 1993;2(4):239-51.
219. Chen H, Cohen P, Kasen S, Gordan K, Dufur R, Smailes E. Construction and validation of a quality of life instrument for young adults. *Qual Life Res*. 2004;13(4):747-59.
220. Patrick DL, Edwards TC, Topolski TD. Adolescent quality of life, part II: initial validation of a new instrument. *J Adolesc*. 2002;25(3):287-300.
221. Edwards TC, Huebner CE, Connell FA, Patrick DL. Adolescent quality of life, part I: conceptual and measurement model. *J Adolesc*. 2002;25(3):275-86.
222. Crick K, Al Sayah F, Ohinmaa A, Johnson JA. Responsiveness of the anxiety/depression dimension of the 3-and 5-level versions of the EQ-5D in assessing mental health. *Qual Life Res*. 2018;27(6):1625-33.
223. de Manincor M, Bensoussan A, Smith CA, Barr K, Schweickle M, Donoghoe LL, et al. INDIVIDUALIZED YOGA FOR REDUCING DEPRESSION AND ANXIETY, AND IMPROVING WELL-BEING: A RANDOMIZED CONTROLLED TRIAL. *Depress Anxiety*. 2016;33(9):816-28.
224. Vaingankar JA, Abdin E, Chong SA, Sambasivam R, Jeyagurunathan A, Seow E, et al. Psychometric properties of the positive mental health instrument among people with mental disorders: a cross-sectional study. *Health and quality of life outcomes*. 2016;14(1):19.
225. McAlinden NM, Oei TP. Validation of the Quality of Life Inventory for patients with anxiety and depression. *Compr Psychiatry*. 2006;47(4):307-14.

226. Zanello A, Berthoud L, Sentissi O. Validation of the Recovery Style Questionnaire in Outpatients With Affective Disorders. *The Journal of nervous and mental disease*. 2019;207(5):400-5.
227. Barber JM, Parsons H, Wilson CA, Cook CCH. Measuring mental health in the clinical setting: what is important to service users? The Mini-Service user Recovery Evaluation scale (Mini-SeRvE). *J Ment Health*. 2017;26(6):530-7.
228. Vaingankar JA, Abdin E, Chong SA, Sambasivam R, Seow E, Jeyagurunathan A, et al. Psychometric properties of the Short Warwick Edinburgh Mental Well-being Scale (SWEMWBS) in service users with schizophrenia, depression and anxiety spectrum disorders. *Health and Quality of Life Outcomes* Vol 15 2017, ArtID 153. 2017;15.
229. Sacchetto B, Ornelas J, Calheiros MM, Shinn M. Adaptation of Nussbaum's capabilities framework to community mental health: A consumer-based capabilities measure. *Am J Community Psychol*. 2018;61(1-2):32-46.
230. Schulenberg SE, Strack KM, Buchanan EM. The Meaning in Life Questionnaire: Psychometric properties with individuals with serious mental illness in an inpatient setting. *J Clin Psychol*. 2011;67(12):1210-9.
231. Xiao L, Gao Y, Zhang L, Chen P, Sun X, Tang S. Adaptation and validation of the "tolerability and quality of life" (TOOL) questionnaire in Chinese bipolar patients. *Qual Life Res*. 2016;25(11):2825-32.
232. Chavez L, Mir K, Canino G. Starting from scratch: The development of the adolescent quality of life-mental health scale (AQOL-MHS). *Culture, Medicine and Psychiatry*. 2012;36(3):465-79.
233. Parkerson Jr GR, Broadhead WE, Chiu-Kit JT. Anxiety and depressive symptom identification using the Duke Health Profile. *J Clin Epidemiol*. 1996;49(1):85-93.
234. Mann JH, William O'Mahen, Heather; Ford, Tamsin. The reliability and validity of the Everyday Feelings Questionnaire in a clinical population. *J Affect Disord*. 2013;148(2-3):406-10.
235. Brazier J, Connell J, Papaioannou D, Mukuria C, Mulhern B, Peasgood T, et al. A systematic review, psychometric analysis and qualitative assessment of generic preference-based measures of health in mental health populations and the estimation of mapping functions from widely used specific measures. *Health Technol Assess*. 2014;18(34):vii.
236. Jutkowitz E, Pizzi L, Hess E, Suh D-C, Gitlin LN. Comparison of three societally derived health-state classification values among older African Americans with depressive symptoms. *Qual Life Res*. 2013;22(6):1491-8.
237. Abdin E, Chong SA, Seow E, Peh CX, Tan JH, Liu J, et al. A comparison of the reliability and validity of SF-6D, EQ-5D and HUI3 utility measures in patients with schizophrenia and patients with depression in Singapore. *Psychiatry Res*. 2019;274:400-8.
238. Mitchell PM, Al-Janabi H, Byford S, Kuyken W, Richardson J, Iezzi A, et al. Assessing the validity of the ICECAP-A capability measure for adults with depression. *BMC Psychiatry*. 2017;17(1).
239. Koivumaa-Honkanen H, Tuovinen TK, Honkalampi K, Antikainen R, Hintikka J, Haatainen K, et al. Mental health and well-being in a 6-year follow-up of patients with depression. *Social psychiatry and psychiatric epidemiology*. 2008;43(9):688.
240. Franken K, Lamers SM, Ten Klooster PM, Bohlmeijer ET, Westerhof GJ. Validation of the Mental Health Continuum - Short Form and the dual continua model of well - being and psychopathology in an adult mental health setting. *J Clin Psychol*. 2018;74(12):2187-202.
241. Pukrop R, Schlaak V, Möller-Leimkühler AM, Albus M, Czernik A, Klosterkötter J, et al. Reliability and validity of Quality of Life assessed by the Short-Form 36 and the Modular System for Quality of Life in patients with schizophrenia and patients with depression. *Psychiatry Res*. 2003;119(1-2):63-79.

242. Chen YH, Allan; While, Alison E. Validity and reliability of the modified Chinese version of the Older People's Quality of Life Questionnaire ( OPQOL) in older people living alone in China. *International Journal of Older People Nursing*. 2014;9(4):306-16.
243. Kumar K, Gupta M. Effectiveness of psycho-educational intervention in improving outcome of unipolar depression: results from a randomised clinical trial. *East Asian Archives of Psychiatry*. 2015;25(1):29.
244. Vaingankar JA, Subramaniam M, Abdin E, Picco L, Phua A, Chua BY, et al. Socio-demographic correlates of positive mental health and differences by depression and anxiety in an Asian community sample. *Ann Acad Med Singap*. 2013;42(10):514-23.
245. Pilkonis PA, Yu L, Dodds NE, Johnston KL, Maihoefer CC, Lawrence SM. Validation of the depression item bank from the Patient-Reported Outcomes Measurement Information System (PROMIS®) in a three-month observational study. *J Psychiatr Res*. 2014;56(1):112-9.
246. Vilagut G, Forero CG, Adroher ND, Olariu E, Cella D, Alonso J, et al. Testing the PROMIS® Depression measures for monitoring depression in a clinical sample outside the US. *J Psychiatr Res*. 2015;68:140-50.
247. Schalet BD, Pilkonis PA, Yu L, Dodds N, Johnston KL, Yount S, et al. Clinical validity of PROMIS Depression, Anxiety, and Anger across diverse clinical samples. *J Clin Epidemiol*. 2016;73:119-27.
248. Carpiello B, Lai G, Pariente C, Carta M, Rudas N. Symptoms, standards of living and subjective quality of life: a comparative study of schizophrenic and depressed out - patients. *Acta Psychiatr Scand*. 1997;96(4):235-41.
249. Pyne JM, Sieber WJ, David K, Kaplan RM, Rapaport MH, Williams DK. Use of the quality of well-being self-administered version (QWB-SA) in assessing health-related quality of life in depressed patients. *J Affect Disord*. 2003;76(1-3):237-47.
250. Salyers MP, Bosworth HB, Swanson JW, Lamb-Pagone J, Osher FC. Reliability and validity of the SF-12 health survey among people with severe mental illness. *Med Care*. 2000;38(11):1141-50.
251. Heslin M, Chua K-C, Trevillion K, Nath S, Howard LM, Byford S. Psychometric properties of the five-level EuroQoL-5 dimension and Short Form-6 dimension measures of health-related quality of life in a population of pregnant women with depression. *BJPsych Open*. 2019;5(6):e88.
252. Dickerson JF, Feeny DH, Clarke GN, MacMillan AL, Lynch FL. Evidence on the longitudinal construct validity of major generic and utility measures of health-related quality of life in teens with depression. *Qual Life Res*. 2018;27(2):447-54.
253. Abdin E, Chong SA, Seow E, Peh CX, Tan JH, Liu J, et al. A comparison of the reliability and validity of SF-6D, EQ-5D and HUI3 utility measures in patients with schizophrenia and patients with depression in Singapore. *Psychiatry Res*. 2019;274:400-8.
254. Kotsou I, Leys C. Subjective Happiness Scale (SHS): Psychometric properties of the French version of the scale (SHS-F) and its relationship to the psychological well-being, effect and depression. *Canadian Journal of Behavioural Science-Revue Canadienne Des Sciences Du Comportement*. 2017;49(1):1-6.
255. Dazord A, Astolfi F, Guisti P, Rebetez MC, Mino A, Terra JL, et al. Quality of life assessment in psychiatry: the Subjective Quality of Life Profile (SQLP)--first results of a new instrument. *Community Ment Health J*. 1998;34(5):525-35.
256. Blom EH, Bech P, Högberg G, Larsson JO, Serlachius E. Screening for depressed mood in an adolescent psychiatric context by brief self-assessment scales – testing psychometric validity of WHO-5 and BDI-6 indices by latent trait analyses. *Health and Quality of Life Outcomes*. 2012;10(1):149.

257. Allgaier AK, Pietsch K, Fruhe B, Prast E, Sigl-Glockner J, Schulte-Korne G. Depression in pediatric care: is the WHO-Five Well-Being Index a valid screening instrument for children and adolescents? *Gen Hosp Psychiatry*. 2012;34(3):234-41.
258. Skevington SM, Wright A. Changes in the quality of life of patients receiving antidepressant medication in primary care: validation of the WHOQOL-100. *Br J Psychiatry*. 2001;178:261-7.
259. Berlim MT, Pavanello DP, Caldieraro MAK, Fleck MPA. Reliability and validity of the WHOQOL BREF in a sample of Brazilian outpatients with major depression. *Qual Life Res*. 2005;14(2):561-4.
260. Naumann VJ, Byrne GJ. WHOQOL-BREF as a measure of quality of life in older patients with depression. *Int Psychogeriatr*. 2004;16(2):159-73.
261. Las Hayas C, Padilla P, Del Barrio AG, Beato-Fernandez L, Muñoz P, Gámez-Guadix M. Individualised Versus Standardised Assessment of Quality of Life in Eating Disorders. *European Eating Disorders Review*. 2016;24(2):147-56.
262. Stoner CR, Orrell M, Spector A. The psychometric properties of the control, autonomy, self-realisation and pleasure scale (CASP-19) for older adults with dementia. *Aging Ment Health*. 2019;23(5):643-9.
263. Wellen B, Skinner L, Freeman J, Stewart E, Garcia A, Sapyta J, et al. Examining the psychometric properties of the Pediatric Quality of Life Enjoyment and Satisfaction Questionnaire in two samples of youth with OCD. *Child Psychiatry and Human Development*. 2017;48(1):180-8.
264. Márquez M, Arenoso H, Caruso N. Efficacy of alprazolam sublingual tablets in the treatment of the acute phase of panic disorders. *Actas Esp Psiquiatr*. 2011;39(2):88-94.
265. Farrand P, Woodford J. Measurement of individualised quality of life amongst young people with indicated personality disorder during emerging adulthood using the SEIQoL-DW. *Qual Life Res*. 2013;22(4):829-38.
266. Chen H, Cohen P, Crawford TN, Kasen S, Johnson JG, Berenson K. Relative impact of young adult personality disorders on subsequent quality of life: findings of a community-based longitudinal study. *J Pers Disord*. 2006;20(5):510-23.
267. Le QA, Doctor JN, Zoellner LA, Feeny NC. Minimal clinically important differences for the EQ-5D and QWB-SA in Post-traumatic Stress Disorder (PTSD): results from a Doubly Randomized Preference Trial (DRPT). *Health and Quality of Life Outcomes*. 2013;11(1):59.
268. Johnson BD, Bormann JE, Glaser D. Validation of the Functional Assessment of Chronic Illness Therapy–Spiritual Well-Being Scale in veterans with PTSD. *Spirituality in Clinical Practice*. 2015;2(1):25.
269. Hinton DE, Sinclair SJ, Chung RC-Y, Pollack MH. The SF-36 among Cambodian and Vietnamese refugees: An examination of psychometric properties. *Journal of Psychopathology and Behavioral Assessment*. 2007;29(1):38-45.
270. Shiner B, Watts BV, Pomerantz A, Young-Xu Y, Schnurr PP. Sensitivity of the SF-36 to PTSD symptom change in veterans. *J Trauma Stress*. 2011;24(1):111-5.
271. Wong N, Sarver DE, Beidel DC. Quality of life impairments among adults with social phobia: the impact of subtype. *J Anxiety Disord*. 2012;26(1):50-7.
272. Beebe LH. Describing the health parameters of outpatients with schizophrenia. *Applied nursing research*. 2006;19(1):43-7.
273. Prieto L, Sacristan J, Hormaechea J, Casado A, Badia X, Gómez J. Psychometric validation of a generic health-related quality of life measure (EQ-5D) in a sample of schizophrenic patients. *Current Medical Research and Opinion*. 2004;20(6):827-35.

274. Ivarsson B, Malm U, Lindström L, Norlander T. The self-assessment Global Quality of Life scale: Reliability and construct validity. *Int*. 2010;14(4):287-97.
275. Luo N, Seng B-K, Thumboo J, Feeny D, Li S-C. A study of the construct validity of the Health Utilities Index Mark 3 (HUI3) in patients with schizophrenia. *Qual Life Res*. 2006;15(5):889-98.
276. Lasch K, Joish VN, Zhu Y, Rosa K, Qiu C, Crawford B. Validation of the sleep impact scale in patients with major depressive disorder and insomnia. *Current Medical Research and Opinion*. 2009;25(7):1699-710.
277. Gaité L, Vázquez-Barquero JL, Arrizabalaga AA, Schene AH, Welcher B, Thornicroft G, et al. Quality of life in schizophrenia: development, reliability and internal consistency of the Lancashire Quality of Life Profile–European Version: Epsilon study 8. *The British Journal of Psychiatry*. 2000;177(S39):s49-s54.
278. Stanga V, Turrina C, Valsecchi P, Sacchetti E, Vita A. Well-being in patients with schizophrenia, mood and personality disorders attending psychiatric services in the community. A controlled study. *Compr Psychiatry*. 2019;91:1-5.
279. Vogel JS, Bruins J, Halbersma L, Lieben RJ, de Jong S, van der Gaag M, et al. Measuring personal recovery in people with a psychotic disorder based on CHIME: A comparison of three validated measures. *International Journal of Mental Health Nursing*. 2020.
280. Holzner B, Kemmler G, Meise U. The impact of work-related rehabilitation on the quality of life of patients with schizophrenia. *Social Psychiatry and Psychiatric Epidemiology*. 1998;33(12):624-31.
281. Simon JA, P.; Gray, A.; Rugkasa, J.; Yeeles, K.; Burns, T. Operationalising the capability approach for outcome measurement in mental health research. *Social Science & Medicine*. 2013;98:187-96.
282. Cannavò D, Minutolo G, Battaglia E, Aguglia E. Insight and recovery in schizophrenic patients. *Int*. 2016;20(2):83-90.
283. Pitknen A, Vlimki M, Endicott J, Katajisto J, Luukkaala T, Koivunen M, et al. Assessing quality of life in patients with schizophrenia in an acute psychiatric setting: Reliability, validity and feasibility of the EQ-5D and the Q-LES-Q. *Nord J Psychiatry*. 2012;66(1):19-25.
284. Bankole AO, Cohen CI, Vahia I, Kehn M, Ramirez PM, Diwan S. Factors affecting quality of life in a multiracial sample of older persons with schizophrenia. *The American journal of geriatric psychiatry*. 2007;15(12):1015-23.
285. Cohen CI, Ramirez PM, Kehn M, Magai C, Eimicke J, Brenner R. Assessing quality of life in older persons with schizophrenia. *The American journal of geriatric psychiatry: official journal of the American Association for Geriatric Psychiatry*. 2003;11(6):658-66.
286. Skantze K. Subjective quality of life and standard of living: a 10 - year follow - up of out - patients with schizophrenia. *Acta Psychiatr Scand*. 1998;98(5):390-9.
287. En-Chi C, Shu-Chun L. Factor structure of the Quality of Life Scale for Mental Disorders in patients with schizophrenia. *J Nurs Res*. 2018;26(3):185-90.
288. Lee S-C, Lin J-D, Chiu E-C. Construct validity of the quality of life for patients with schizophrenia. *臺灣精神醫學*. 2014;28(1):ii+ 16-26.
289. Williams J, Leamy M, Pesola F, Bird V, Le Boutillier C, Slade M. Psychometric evaluation of the Questionnaire about the Process of Recovery (QPR). *The British Journal of Psychiatry*. 2015;207(6):551-5.

290. Pyne JM, Sullivan G, Kaplan R, Williams DK. Comparing the sensitivity of generic effectiveness measures with symptom improvement in persons with schizophrenia. *Med Care*. 2003;208-17.
291. Cavelti M, Kvrđic S, Beck E-M, Kossowsky J, Vauth R. Assessing recovery from schizophrenia as an individual process. A review of self-report instruments. *European psychiatry*. 2012;27(1):19-32.
292. Tan K-A, Fernandez A. Examining the reliability and factor structure of the Malay version of the Recovery Self-Assessment in a sample of individuals with schizophrenia. *Psychiatric rehabilitation journal*. 2018;41(4):336.
293. Rosenberg D, Svedberg P, Schön U-K. Establishing a recovery orientation in mental health services: Evaluating the Recovery Self-Assessment (RSA) in a Swedish context. *Psychiatric rehabilitation journal*. 2015;38(4):328.
294. Huo T, Guo Y, Shenkman E, Muller K. Assessing the reliability of the short form 12 (SF-12) health survey in adults with mental health conditions: a report from the wellness incentive and navigation (WIN) study. *Health and quality of life outcomes*. 2018;16(1):34-.
295. Papaioannou DB, J.; Parry, G. How valid and responsive are generic health status measures, such as EQ-5D and SF-36, in Schizophrenia? A systematic review. *Value Health*. 2011;14(6):907-20.
296. Su CT, Ng HS, Yang AL, Lin CY. Psychometric evaluation of the Short Form 36 Health Survey (SF-36) and the World Health Organization Quality of Life Scale Brief Version (WHOQOL-BREF) for patients with schizophrenia. *Psychol Assess*. 2014;26(3):980-9.
297. Mulhern B, Mukuria C, Barkham M, Knapp M, Byford S, Soeteman Dr, et al. Using generic preference-based measures in mental health: psychometric validity of the EQ-5D and SF-6D. *British Journal of Psychiatry*. 2014;205(3):236-43.
298. Franklin M, Mukuria C, Mulhern B, Tran I, Brazier J, Watson S. Measuring the Burden of Schizophrenia Using Clinician and Patient-Reported Measures: An Exploratory Analysis of Construct Validity. *The Patient - Patient-Centered Outcomes Research*. 2019;12(4):405-17.
299. Carlson J, Ochoa S, Haro JM, Escartin G, Ahuir M, Gutierrez-Zotes A, et al. Adaptation and validation of the quality-of-life scale: Satisfaction with Life Domains Scale by Baker and Intagliata. *Compr Psychiatry*. 2009;50(1):76-80.
300. Schmidt P, Clouth J, Haggemüller L, Naber D, Reitberger U. Constructing an Index for the Subjective Well-being Under Neuroleptics Scale (SWN), short form: Applying structural equation modeling for testing reliability and validity of the index. *Qual Life Res*. 2006;15(7):1191.
301. Sanjuan J, Haro JM, Maurino J, Diez T, Ballesteros J. Validation of the Spanish version of the subjective well-being under neuroleptic scale (SWN) in patients with schizophrenia. *European Psychiatry*. 2010;25.
302. Haring LM, R.; Jaanson, P.; Pilli, R.; Mägi, K.; Maron, E. Subjective Well-Being Under Neuroleptics Scale short form (SWN-K): Reliability and validity in an Estonian speaking sample. *Ann Gen Psychiatry*. 2013;12(1).
303. Montejo AL, Lauffer JC, Cuervo J, Rebollo P, Cordero L, Diez T, et al. Validation of a specific measure to assess health-related quality of life in patients with schizophrenia and bipolar disorder: The 'Tolerability and quality of life' (TOOL) questionnaire. *Ann Gen Psychiatry*. 2011;10.
304. Trousselard M, Steiler D, Duthel F, Claverie D, Canini F, Fenouillet F, et al. Validation of the Warwick-Edinburgh Mental Well-Being Scale (WEMWBS) in French psychiatric and general populations. *Psychiatry Res*. 2016;245:282-90.
305. Orsel S, Akdemir A, Dağ I. The sensitivity of quality-of-life scale WHOQOL-100 to psychopathological measures in schizophrenia. *Compr Psychiatry*. 2004;45(1):57-61.

306. Test MA, Greenberg JS, Long JD, Brekke JS, Burke SS. Construct Validity of a Measure of Subjective Satisfaction With Life of Adults With Serious Mental Illness. *Psychiatr Serv*. 2005;56(3):292-300.
307. Diaz P, Mercier C, Hachey R, Caron J, Boyer G. An evaluation of psychometric properties of the client's questionnaire of the Wisconsin Quality of Life Index-Canadian version (CaW-QLI). *Qual Life Res*. 1999;8(6):509-14.
308. Wasserman DA, Sorensen JL, Delucchi KL, Masson CL, Hall SM. Psychometric evaluation of the quality of life interview, brief version, in injection drug users. *Psychology of Addictive Behaviors*. 2006;20(3):316.
309. Wennberg P, Philips B, de Jong K. The Swedish version of the Outcome Questionnaire (OQ - 45): Reliability and factor structure in a substance abuse sample. *Psychology and Psychotherapy: Theory, Research and Practice*. 2010;83(3):325-9.
310. Bourion-Bédès S, Schwan R, Laprevote V, Bédès A, Bonnet J-L, Baumann C. Differential item functioning (DIF) of SF-12 and Q-LES-Q-SF items among french substance users. *Health and quality of life outcomes*. 2015;13(1):172.
311. Muller AE, Skurtveit S, Clausen T. Validating the generic quality of life tool "QOL10" in a substance use disorder treatment cohort exposes a unique social construct. *BMC Med Res Methodol*. 2016;16(1):60.
312. Ventegodt S, Merrick J, Andersen NJ. Quality of life as medicine. II. A pilot study of a five-day "quality of life and health" cure for patients with alcoholism. *ScientificWorldJournal*. 2003;3:842-52.
313. Haggerty GA, K.; Ghosh, K.; Babalola, R.; Ahmed, Z.; Alois, A. Construct validity of the Schwartz Outcome Scale: validation using a 28-day inpatient chemical rehabilitation patient sample. *J Nerv Ment Dis*. 2012;200(4):343-8.
314. Strada LV, W.; Buchholz, A.; Schulte, B.; Muller, A. E.; Verthein, U.; Reimer, J. Measuring quality of life in opioid-dependent people: a systematic review of assessment instruments. *Qual Life Res*. 2017;26(12):3187-200.
315. Garcia-Rea E, LePage JP. Reliability and validity of World Health Organization Quality of Life-100 in homeless substance-dependent veteran population. *J Rehabil Res Dev*. 2008;45(4):619-25.
316. Pilkonis PAY, L.; Dodds, N. E.; Johnston, K. L.; Lawrence, S. M.; Daley, D. C. Validation of the alcohol use item banks from the Patient-Reported Outcomes Measurement Information System (PROMIS). *Drug Alcohol Depend*. 2016;161:316-22.
317. Furber G, Segal L. The validity of the Child Health Utility instrument (CHU9D) as a routine outcome measure for use in child and adolescent mental health services. *Health and quality of life outcomes*. 2015;13(1):22.
318. Lobban F, Robinson H, Appelbe D, Barraclough J, Bedson E, Collinge L, et al. Protocol for an online randomised controlled trial to evaluate the clinical and cost-effectiveness of a peer-supported self-management intervention for relatives of people with psychosis or bipolar disorder: Relatives Education And Coping Toolkit (REACT). *BMJ Open*. 2017;7(7):e016965.
319. Schmidt S, Mühlhan H, Power M. The EUROHIS-QOL 8-item index: psychometric results of a cross-cultural field study. *The European Journal of Public Health*. 2006;16(4):420-8.
320. Schotanus-Dijkstra M, Ten Klooster PM, Drossaert CHC, Pieterse ME, Bolier L, Walburg JA, et al. Validation of the Flourishing Scale in a sample of people with suboptimal levels of mental well-being. *BMC Psychol*. 2016;4:12-.
321. Luijten CC, Kuppens S, van de Bongardt D, Nieboer AP. Evaluating the psychometric properties of the mental health continuum-short form (MHC-SF) in Dutch adolescents. *Health and quality of life outcomes*. 2019;17(1):157.

322. Bullock W. The Mental Health Recovery Measure (MHRM): updated normative data and psychometric properties. Toledo: Department of Psychology, University of Toledo. 2009.
323. Łaszewska A, Schwab M, Leutner E, Oberrauter M, Spiel G, Simon J. Measuring broader wellbeing in mental health services: Validity of the German language OxCAP-MH capability instrument. *Qual Life Res.* 2019;28(8):2311-23.
324. Bastiaansen D, Koot H, Bongers I, Varni J, Verhulst F. Measuring quality of life in children referred for psychiatric problems: Psychometric properties of the PedsQL TM 4.0 generic core scales. *Qual Life Res.* 2004;13(2):489-95.
325. Riley WT, Pilkonis P, Cella D. Application of the national institutes of health patient-reported outcome measurement information system (PROMIS) to mental health research. *Journal of Mental Health Policy and Economics.* 2011;14(4):201-8+11+14.
326. Bishop S, Walling D, Dott S, Folkes C, Bucy J. Refining quality of life: validating a multidimensional factor measure in the severe mentally ill. *Qual Life Res.* 1999;8(1-2):151-60.
327. Riendeau RP, Sullivan JL, Meterko M, Stolzmann K, Williamson AK, Miller CJ, et al. Factor structure of the Q-LES-Q short form in an enrolled mental health clinic population. *Qual Life Res.* 2018;27(11):2953-64.
328. Bigelow DA, McFarland BH, Gareau MJ, Young DJ. Implementation and effectiveness of a bed reduction project. *Community Ment Health J.* 1991;27(2):125-33.
329. Bigelow DA, McFarland BH, Olson MM. Quality of life of community mental health program clients: Validating a measure. *Community Ment Health J.* 1991;27(1):43-55.
330. Placentino A, Rossi G, Pioli R, Saltini A. Disturbi psichici e qualità della vita: La prospettiva dei pazienti e di informatori-chiave. *Rivista di psichiatria.* 2003.
331. Argentzell EH, Jenny; Neil, Sandra; Eklund, Mona. Measuring personal recovery- Psychometric properties of the Swedish Questionnaire about the Process of Recovery (QPR-Swe). *Nord J Psychiatry.* 2017;71(7):529-35.
332. Russinova Z, Rogers ES, Cook KF, Ellison ML, Lyass A. Conceptualization and measurement of mental health providers' recovery-promoting competence: The Recovery Promoting Relationships Scale (RPRS). *Psychiatric Rehabilitation Journal.* 2013;36(1):7.
333. Barbic SPK, S. A.; Davidson, L.; McKenzie, K.; O'Connell, M. J. Validation of the brief version of the Recovery Self-Assessment (RSA-B) using Rasch measurement theory. *Psychiatric Rehabilitation Journal.* 2015;38(4):349-58.
334. Prince PN, Gerber GJ. Measuring subjective quality of life in people with serious mental illness using the SEIqoL-DW. *Qual Life Res.* 2001;10(2):117-22.
335. Young JL, Waehler CA, Laux JM, McDaniel PS, Hilsenroth MJ. Four studies extending the utility of the Schwartz Outcome Scale (SOS-10). *J Pers Assess.* 2003;80(2):130-8.
336. Cramm JM, Nieboer AP. The importance of productive patient-professional interaction for the well-being of chronically ill patients. *Quality of life research : an international journal of quality of life aspects of treatment, care and rehabilitation.* 2015;24(4):897-903.
337. Aishvarya S, Maniam T, Karuthan C, Sidi H, Jaafar NRN, Oei TPS. Psychometric properties and validation of the Satisfaction With Life Scale in psychiatric and medical outpatients in Malaysia. *Compr Psychiatry.* 2014;55:S101-S6.
338. Forsell Y. Psychiatric Symptoms, Social Disability, Low Wellbeing and Need for Treatment: Data from a Population-Based Study. *Int J Soc Psychiatry.* 2004;50(3):195-203.



339. Oliveira SEH, Carvalho H, Esteves F. Toward an understanding of the quality of life construct: Validity and reliability of the WHOQOL-Bref in a psychiatric sample. *Psychiatry Res.* 2016;244:37-44.
340. Trompenaars FJ, Masthoff ED, Van Heck GL, Hodiament PP, De Vries J. Content validity, construct validity, and reliability of the WHOQOL-Bref in a population of Dutch adult psychiatric outpatients. *Qual Life Res.* 2005;14(1):151-60.
341. Lucchetti G, Lucchetti ALG, de Bernardin Goncalves JP, Vallada HP. Validation of the Portuguese version of the Functional Assessment of Chronic Illness Therapy-Spiritual Well-Being scale (FACIT-Sp 12) among Brazilian psychiatric inpatients. *Journal of Religion and Health.* 2015;54(1):112-21.
342. Schacht A, Escobar R, Wagner T, Wehmeier PM. Psychometric properties of the quality of life scale Child Health and Illness Profile-Child Edition in a combined analysis of five atomoxetine trials. *Atten Defic Hyperact Disord.* 2011;3(4):335-49.
343. Riley AW, Coghill D, Forrest CB, Lorenzo MJ, Ralston SJ, Spiel G, et al. Validity of the health-related quality of life assessment in the ADORE study: Parent Report Form of the CHIP-Child Edition. *Eur Child Adolesc Psychiatry.* 2006;15(1):i63-i71.
344. Zare R, Jafari P, Ghanizadeh A. Do Adult Attention Deficit Hyperactivity Disorder Quality-Of-Life (AAQoL) scale and the SF-36 scale measure the same construct of health-related quality of life? *Atten Defic Hyperact Disord.* 2017;9(1):39-45.
345. Flapper BCT, Schoemaker MM. Effects of methylphenidate on quality of life in children with both developmental coordination disorder and ADHD. *Dev Med Child Neurol.* 2008;50(4):294-9.
346. Rivard M, Mercier C, Mestari Z, Terroux A, Mello C, Begin J. Psychometric properties of the beach center family quality of life in French-speaking families with a preschool-aged child diagnosed with autism spectrum disorder. *American Journal on Intellectual and Developmental Disabilities.* 2017;122(5):439-52.
347. Cotteceau H, Roux S, Blanc R, Lenoir P, Bonnet-Brilhault F, Barthélémy C. Quality of life of adolescents with autism spectrum disorders: comparison to adolescents with diabetes. *Eur Child Adolesc Psychiatry.* 2012;21(5):289-96.
348. McDowell C, Gordon B, MacDonncha C, Herring M. Physical activity correlates among older adults with probable generalized anxiety disorder: results from the Irish longitudinal study on ageing. *Gen Hosp Psychiatry.* 2019;59:30-6.
349. Novella J, Ankri J, Morrone I, Guillemin F, Jolly D, Jochum C, et al. Evaluation of the quality of life in dementia with a generic quality of life questionnaire: the Duke Health Profile. *Dement Geriatr Cogn Disord.* 2001;12(2):158-66.
350. Negri L, Piazza G, Sartori RDG, Cocchi MG, Delle Fave A. The adult carer quality of life questionnaire (AC-QoL): comparison with measures of burden and well-being, and Italian validation. *Disabil Rehabil.* 2019;41(10):1207-16.
351. Brand C, O'Connell BH, Gallagher S. A randomised controlled trial of benefit finding in caregivers: The Building Resources in Caregivers Study Protocol. *Health Psychol Open.* 2015;2(2):2055102915595019.
